# Supplementary material for: Aroma characterization based on aromatic series analysis in table grapes
Source: Springer Nature journal article supplement (doi:10.1038/srep31116), 2016-08-04
Supplement: 41598_2016_BFsrep31116_MOESM20_ESM.pdf [file 41598_2016_BFsrep31116_MOESM20_ESM.pdf]

# **Aroma characterization based on aromatic series analysis in table grapes**

Yusen Wu, Shuyan Duan, Liping Zhao, Zhen Gao, Meng Luo, Shiren Song, Wenping Xu, Caixi Zhang, Chao Ma\*, Shiping Wang\*

Department of Plant Science, School of Agriculture and Biology, Shanghai Jiao Tong University, Shanghai, China.

\* **Corresponding author:** Department of Plant Science, School of Agriculture and Biology, Shanghai Jiao Tong University, Shanghai, China.

Tel& Fax: +0086-21-34205961

E-mail address: [fruit@sjtu.edu.cn](mailto:fruit@sjtu.edu.cn), [chaoma2015@sjtu.edu.cn](mailto:chaoma2015@sjtu.edu.cn)

## Supplementary information

### Figures

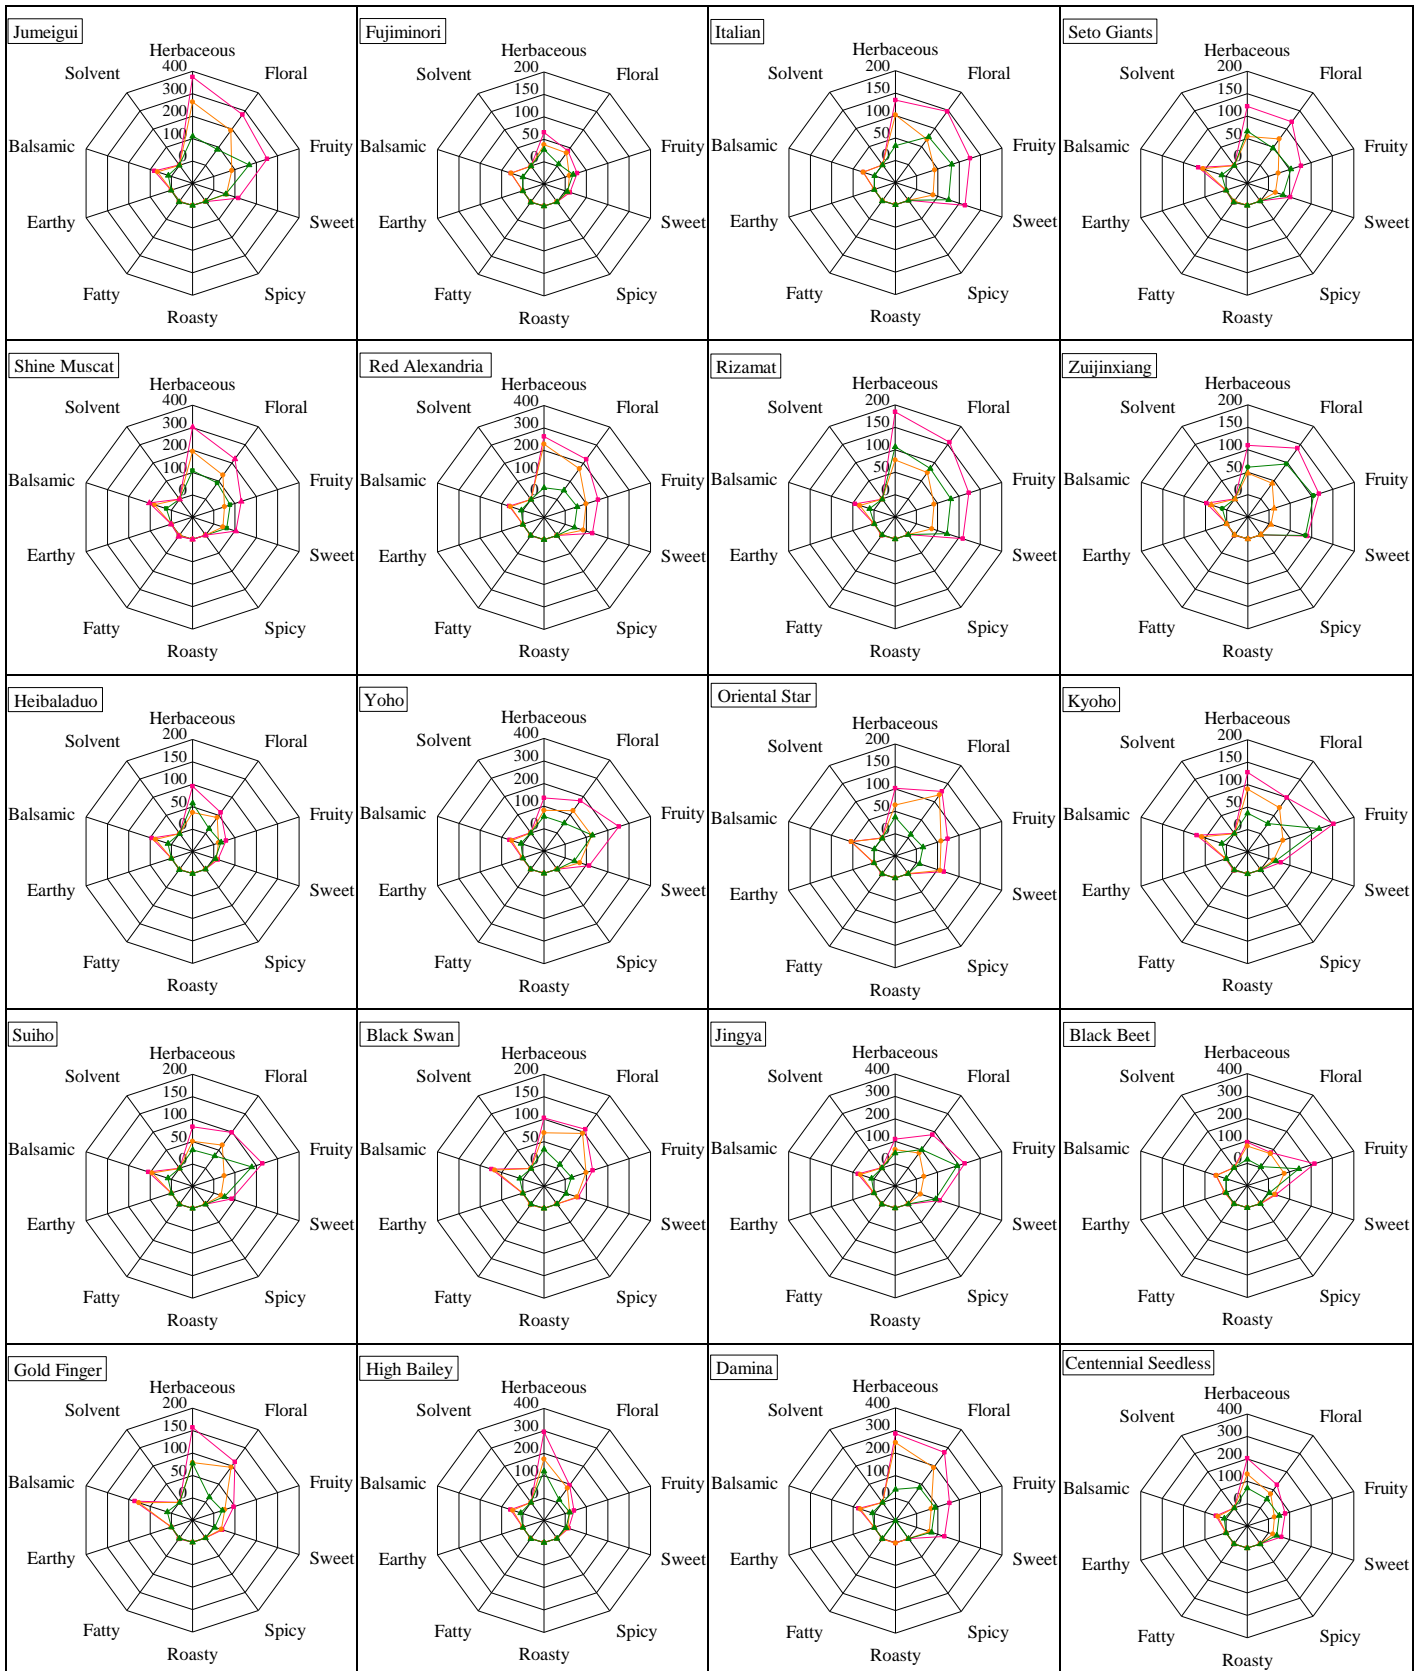

**Figure S1. Aromatic fingerprints of table grapes.** Green line with triangle indicated the fingerprints of pulp juice; yellow line with dot indicated the fingerprints of skin; wine red line with square indicated the fingerprints of whole berries. Scale range of nine cultivars (Jumeigui, Shine Muscat, Red Alexandria, Yoho, Jingya, Black Beet, High Bailey, Tamina, Centennial Seedless) was 0-400; the others was 0-200.

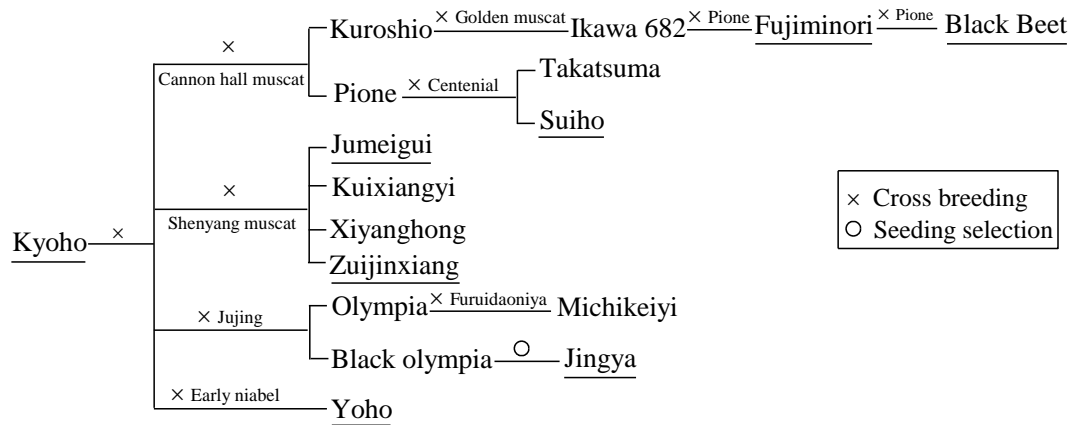

**Figure S2. Part pedigree chart of Kyoho grapevine series (Kyoho or its offspring).** The eight cultivars (A, B, H, J, L, M, O, P) in this study were underlined. Cross indicated cross breeding; circle indicated seeding selection.

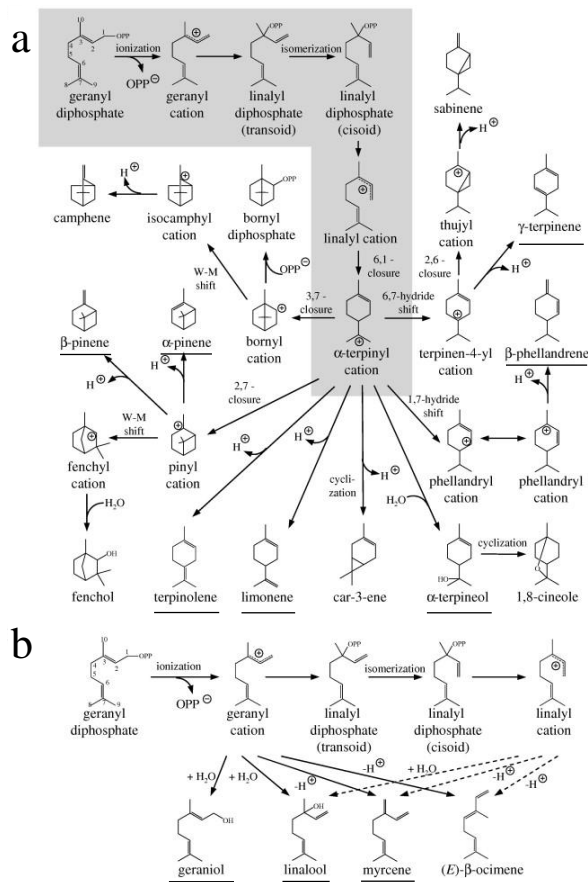

**Figure S3. Synthesis mechanisms of monoterpenes in grapes obtained from the previous report<sup>25</sup>.** (a) indicated synthetic pathway of cyclic monoterpenes; (b) indicated synthetic pathway of acyclic monoterpenes. The mainly compounds in this study are underlined, including cyclics ( $\alpha$ -pinene,  $\beta$ -pinene, phellandrene, limonene,  $\gamma$ -terpinene,  $\alpha$ -terpineol, terpinolene) and acyclics (linalool,  $\beta$ -myrcene, geraniol).

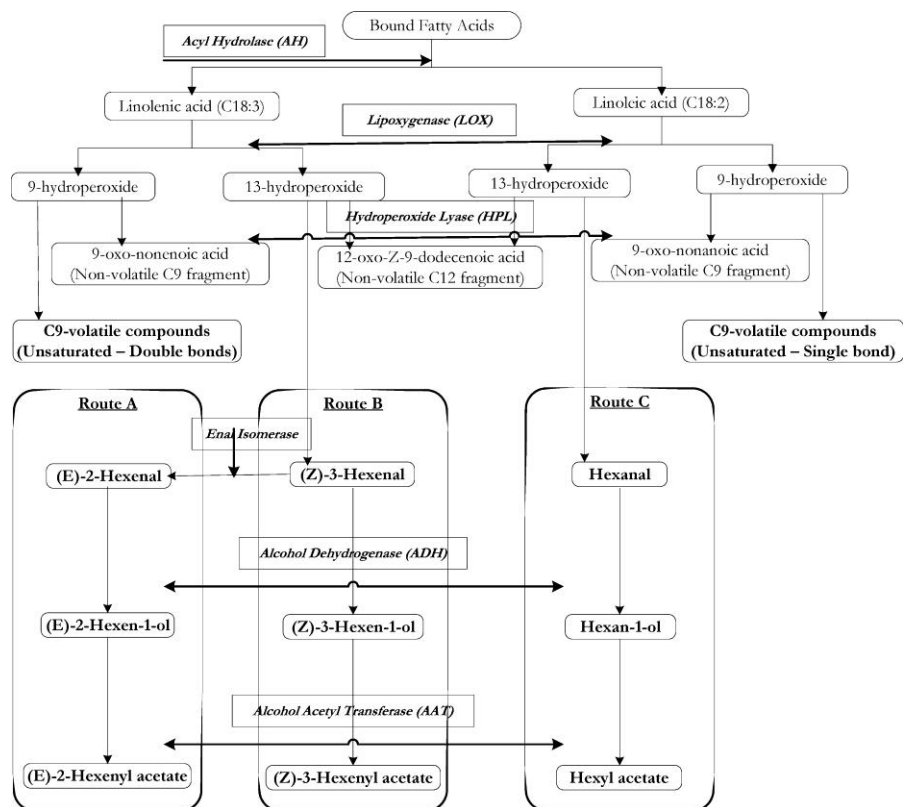

**Figure S4. Metabolic pathway of C<sub>6</sub> compounds in grapes obtained from the previous report<sup>11,20</sup>.** Route A, B, C indicated the different metabolic pathways, respectively.

|   | Herbaceous | Floral | Fruity | Sweet  | Spicy | Roasty | Fatty | Earthy | Balsamic | Solvent |      |
|---|------------|--------|--------|--------|-------|--------|-------|--------|----------|---------|------|
| A | 374.88     | 279.68 | 251.36 | 116.22 | 1.21  | 0.22   | 4.28  | 1.93   | 80.18    | 1.34    | 4.47 |
| B | 65.99      | 41.84  | 29.02  | 11.74  | 0.33  | 0.08   | 1.72  | 0.73   | 28.53    | 0.31    | 1.97 |
| C | 134.46     | 146.81 | 125.30 | 114.04 | 0.01  | 0.13   | 1.70  | 0.56   | 26.29    | 0.00    | 4.19 |
| D | 122.07     | 120.08 | 76.79  | 51.54  | 0.00  | 0.10   | 3.74  | 0.96   | 65.86    | 0.00    | 4.19 |
| E | 302.77     | 221.39 | 128.66 | 103.46 | 0.00  | 0.24   | 6.68  | 1.07   | 104.76   | 0.00    | 4.81 |
| F | 262.38     | 221.24 | 154.37 | 127.38 | 0.08  | 0.38   | 1.88  | 0.60   | 64.52    | 0.01    | 4.33 |
| G | 184.50     | 156.60 | 123.20 | 109.18 | 0.00  | 0.08   | 1.92  | 0.58   | 45.18    | 0.00    | 3.56 |
| H | 109.77     | 139.46 | 117.17 | 90.36  | 0.30  | 0.07   | 1.86  | 0.54   | 47.75    | 0.33    | 3.92 |
| I | 96.15      | 58.02  | 29.28  | 10.38  | 0.00  | 0.09   | 1.54  | 0.54   | 46.25    | 0.00    | 2.31 |
| J | 136.43     | 177.16 | 251.58 | 112.64 | 1.08  | 0.12   | 2.61  | 2.71   | 62.28    | 1.61    | 4.36 |
| K | 101.82     | 128.66 | 74.11  | 64.70  | 0.13  | 0.16   | 1.04  | 1.28   | 53.73    | 0.13    | 3.94 |
| L | 127.50     | 99.61  | 151.88 | 28.39  | 1.07  | 0.05   | 3.15  | 2.33   | 69.85    | 1.27    | 3.53 |
| M | 83.29      | 98.93  | 114.65 | 42.85  | 0.46  | 0.11   | 1.56  | 0.83   | 54.54    | 0.35    | 3.94 |
| N | 102.66     | 107.45 | 65.11  | 30.69  | 0.02  | 0.08   | 2.70  | 1.29   | 73.97    | 0.02    | 3.92 |
| O | 109.81     | 184.05 | 226.74 | 109.55 | 1.23  | 0.15   | 2.04  | 1.20   | 75.34    | 1.68    | 3.89 |
| P | 94.59      | 81.91  | 217.08 | 33.94  | 1.19  | 0.15   | 2.67  | 5.93   | 47.40    | 1.02    | 3.83 |
| Q | 156.87     | 110.96 | 47.00  | 20.44  | 0.02  | 0.04   | 2.75  | 0.52   | 86.55    | 0.02    | 3.94 |
| R | 295.03     | 94.88  | 42.09  | 16.84  | 0.00  | 0.32   | 2.31  | 0.71   | 57.65    | 0.00    | 3.97 |
| S | 285.39     | 273.57 | 154.10 | 130.58 | 0.02  | 0.79   | 2.09  | 0.26   | 75.07    | 0.00    | 4.33 |
| T | 201.98     | 126.95 | 78.97  | 60.61  | 0.01  | 0.17   | 1.34  | 0.21   | 47.36    | 0.00    | 4.19 |

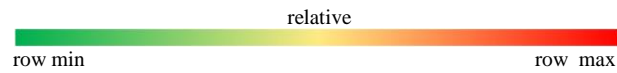

**Figure S5. The relationship between aromatic series values (whole berries) and aroma preference intensity scores (scale: 1-5) obtained from sensory evaluation analysis.** Data were means (n=3). Ten aromatic series were shown across the top and the colour scale was shown at the bottom. The higher values for each aromatic series were presented in red; otherwise, green was used; white represents the value less than 1. Capital letters (right) referred to the table grape cultivars listed in Figure 1, and their aroma preference scores (left) were shown.

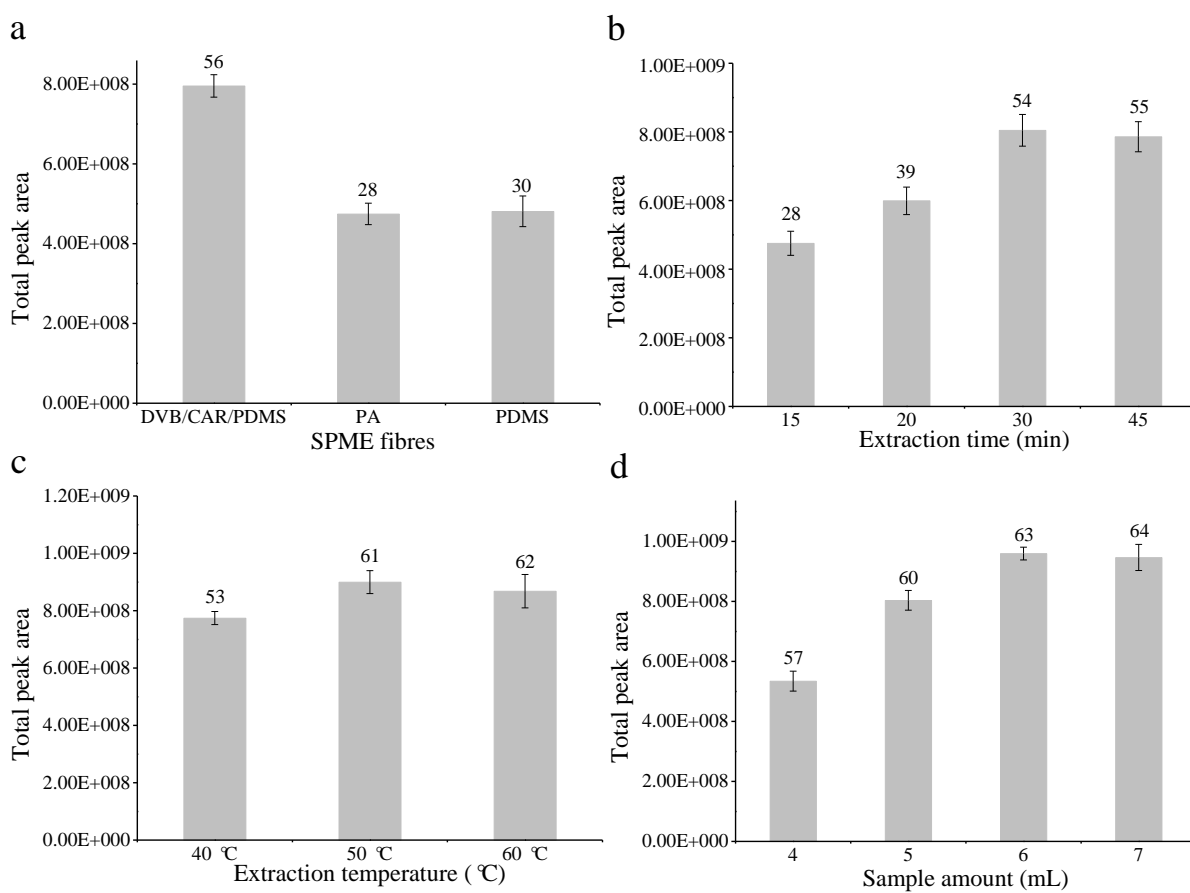

**Figure S6. The optimization of headspace solid phase microextraction (HS-SPME) method.** Performance characteristics obtained for tested solid phase microextraction (SPME) fibres (a) during 40 min at 40 °C, extraction time (b) using divinylbenzene/carboxen/polydimethylsiloxane (DVB/CAR/PDMS) fibre at 40 °C, extraction temperature (c) using DVB/CAR/PDMS fibre during 30 min and volume/headspace volume ratio (d) using DVB/CAR/PDMS fibre during 30 min at 50 °C on total aroma peak area in this work. Number indicated the number of kinds of identified compounds. The best results were obtained using 6 mL of sample (pulp juice or skin extraction solutions) in a 20 mL glass vial with addition of 1.5 g of sodium chloride (NaCl) ( $1/\beta = 0.5$ ), and after equilibrating, a DVB/CAR/PDMS (50/30  $\mu\text{m}$ ) fibre was selected for extraction at 50 °C for 30 min under agitation. Note: in Figure S6 (a), DVB/CAR/PDMS, PA, PDMS indicated divinylbenzene/carboxen/polydimethylsiloxane (50/30  $\mu\text{m}$ ), polyacrylate (85  $\mu\text{m}$ ), polydimethylsiloxane (100  $\mu\text{m}$ ) fiber, respectively.

## Tables

| Monoterpenes        | Cultivars      |               |               |               |               |               |               |               |               |               |               |               |               |                |               |               |                |               |               |               |
|---------------------|----------------|---------------|---------------|---------------|---------------|---------------|---------------|---------------|---------------|---------------|---------------|---------------|---------------|----------------|---------------|---------------|----------------|---------------|---------------|---------------|
|                     | A              | B             | C             | D             | E             | F             | G             | H             | I             | J             | K             | L             | M             | N              | O             | P             | Q              | R             | S             | T             |
| <b>Cyclics</b>      |                |               |               |               |               |               |               |               |               |               |               |               |               |                |               |               |                |               |               |               |
| $\alpha$ -Pinene    | -              | -             | -             | -             | -             | -             | -             | -             | -             | -             | -             | -             | -             | -              | -             | -             | 1.05           | 0.71          | -             | -             |
| Phellandrene        | 0.47           | 0.17          | 0.21          | -             | 0.59          | 0.23          | -             | 0.20          | -             | 0.26          | 0.17          | 0.46          | 0.74          | -              | 0.23          | 0.44          | -              | -             | 0.63          | 0.25          |
| 4-Terpineol         | 4.98           | 0.35          | 0.25          | -             | -             | 0.25          | -             | 0.54          | -             | 3.12          | -             | 1.19          | 2.59          | -              | 1.19          | 1.44          | -              | -             | 0.89          | 0.19          |
| D-Limonene          | 42.74          | 26.55         | 6.16          | 0.13          | 2.27          | 2.06          | -             | -             | -             | -             | -             | -             | -             | -              | -             | -             | 59.44          | 44.93         | 21.34         | 11.13         |
| $\gamma$ -Terpinene | 3.38           | 0.89          | -             | -             | -             | -             | -             | 0.34          | -             | 0.53          | -             | 1.20          | 1.61          | -              | 0.59          | -             | 1.10           | 0.93          | -             | 0.54          |
| $\alpha$ -Terpineol | 36.74          | 0.61          | 18.20         | 0.50          | 16.11         | 18.92         | 0.53          | 0.36          | 0.63          | 0.91          | 0.53          | 0.64          | 0.28          | 1.07           | 1.13          | 0.32          | 1.30           | 39.32         | 4.15          |               |
| Terpinolene         | 0.95           | 0.23          | 2.30          | -             | 1.88          | 1.82          | -             | 0.16          | -             | 0.19          | 0.18          | -             | 0.49          | -              | 0.36          | 0.45          | -              | 0.39          | 4.94          | 1.00          |
| P-Cymene            | 0.39           | 0.23          | 0.27          | -             | -             | -             | -             | 0.02          | -             | 0.12          | -             | 0.11          | 0.41          | -              | 0.07          | 0.15          | 0.10           | 0.03          | 0.16          | 0.05          |
| SubTOTAL            | 89.65          | 29.03         | 27.39         | 0.63          | 20.85         | 23.28         | 0.53          | 1.78          | 0.36          | 4.85          | 1.26          | 3.49          | 6.48          | 0.28           | 3.51          | 3.61          | 62.01          | 48.29         | 67.28         | 17.31         |
| %                   | <b>14.17%</b>  | <b>72.20%</b> | <b>12.44%</b> | <b>6.87%</b>  | <b>5.02%</b>  | <b>9.85%</b>  | <b>7.74%</b>  | <b>19.20%</b> | <b>5.01%</b>  | <b>35.95%</b> | <b>1.82%</b>  | <b>34.76%</b> | <b>84.38%</b> | <b>100.00%</b> | <b>45.12%</b> | <b>20.90%</b> | <b>100.00%</b> | <b>28.64%</b> | <b>14.40%</b> | <b>20.48%</b> |
| <b>Acyclics</b>     |                |               |               |               |               |               |               |               |               |               |               |               |               |                |               |               |                |               |               |               |
| Roseoxide II (cis)  | 4.85           | 0.13          | -             | -             | -             | -             | -             | -             | -             | -             | -             | -             | -             | -              | -             | -             | -              | -             | -             | -             |
| Roseoxide I (trans) | 1.28           | -             | -             | -             | 0.60          | 0.18          | -             | -             | -             | -             | -             | -             | -             | -              | -             | -             | -              | -             | -             | -             |
| Nerol oxide         | -              | -             | -             | -             | -             | 3.76          | -             | -             | -             | -             | -             | -             | -             | -              | -             | -             | -              | -             | -             | 1.12          |
| Linalool            | 310.40         | 0.80          | 123.02        | -             | 328.13        | 137.82        | 0.17          | -             | -             | -             | 2.32          | -             | -             | -              | -             | -             | -              | 3.14          | 290.69        | 10.19         |
| Hotrienol           | 3.11           | -             | 1.84          | -             | 4.41          | 11.39         | 0.04          | -             | -             | -             | -             | -             | -             | -              | -             | -             | -              | -             | 2.33          | 3.77          |
| Neral               | 3.71           | -             | -             | -             | -             | 0.72          | -             | -             | -             | -             | 1.75          | -             | -             | -              | -             | -             | -              | 2.20          | 1.25          | 0.17          |
| $\beta$ -Myrcene    | 5.50           | 2.37          | -             | -             | -             | -             | -             | -             | -             | -             | -             | -             | -             | -              | -             | -             | -              | 2.52          | -             | -             |
| Geranial            | 7.90           | 0.49          | 0.75          | 0.24          | 1.44          | 1.76          | 0.47          | -             | -             | -             | 3.12          | 0.19          | -             | -              | 0.47          | -             | 3.64           | 2.68          | 0.84          |               |
| Citronellol         | 21.91          | -             | -             | -             | 4.20          | 1.55          | 1.21          | 1.24          | 1.15          | 1.95          | 1.29          | 1.34          | 1.20          | -              | 1.51          | 1.57          | -              | 2.18          | 1.57          | 1.18          |
| Nerol               | 22.51          | 2.29          | 8.07          | 2.44          | 12.16         | 12.88         | -             | 2.15          | 2.10          | 2.49          | 7.49          | 2.27          | -             | -              | 4.46          | -             | 11.38          | 17.02         | 6.05          |               |
| Geraniol            | 128.68         | 3.12          | 20.50         | 2.69          | 20.96         | 27.29         | 2.74          | 2.60          | 2.42          | 2.66          | 35.45         | 2.75          | -             | -              | 2.76          | 5.68          | -              | 51.91         | 73.46         | 23.51         |
| Geranic acid        | 33.04          | 1.98          | 38.52         | 3.17          | 22.96         | 15.78         | 1.69          | 1.50          | 1.15          | 1.54          | 16.67         | -             | -             | -              | 1.48          | -             | 43.37          | 10.92         | 20.38         |               |
| SubTOTAL            | 542.89         | 11.18         | 192.70        | 8.54          | 394.86        | 213.13        | 6.32          | 7.49          | 6.82          | 8.64          | 68.09         | 6.55          | 1.20          | 0.00           | 4.27          | 13.66         | 0.00           | 120.34        | 399.92        | 67.21         |
| %                   | <b>85.83%</b>  | <b>27.80%</b> | <b>87.56%</b> | <b>93.13%</b> | <b>94.98%</b> | <b>90.15%</b> | <b>92.26%</b> | <b>80.80%</b> | <b>94.99%</b> | <b>64.05%</b> | <b>98.18%</b> | <b>65.24%</b> | <b>15.63%</b> | <b>0.00%</b>   | <b>54.88%</b> | <b>79.10%</b> | <b>0.00%</b>   | <b>71.36%</b> | <b>85.60%</b> | <b>79.52%</b> |
| TOTAL terpenes      | 632.54         | 40.21         | 220.09        | 9.17          | 415.71        | 236.41        | 6.85          | 9.27          | 7.18          | 13.49         | 69.35         | 10.04         | 7.68          | 0.28           | 7.78          | 17.27         | 62.01          | 168.63        | 467.2         | 84.52         |
| % <sup>a</sup>      | <b>100.00%</b> | <b>97.31%</b> | <b>99.41%</b> | <b>89.81%</b> | <b>99.34%</b> | <b>99.68%</b> | <b>82.33%</b> | <b>88.20%</b> | <b>82.43%</b> | <b>91.58%</b> | <b>99.10%</b> | <b>92.19%</b> | <b>89.10%</b> | <b>38.36%</b>  | <b>86.44%</b> | <b>97.24%</b> | <b>99.01%</b>  | <b>99.72%</b> | <b>99.77%</b> | <b>99.44%</b> |

**Table S1. Concentrations ( $\mu\text{g}/\text{kg}$ ) of monoterpenes determined in pulp juice of table grapes.** Data are shown as the means ( $n=3$ ). %<sup>a</sup> indicated that the percentage of monoterpenes contents account for the total terpenes contents. - indicated that the compound was not detected. Capital letters refer to the table grape cultivars listed in Figure 1.



| Monoterpenes        | Cultivars     |               |               |               |               |               |               |               |               |               |               |               |               |               |               |               |               |               |               |               |
|---------------------|---------------|---------------|---------------|---------------|---------------|---------------|---------------|---------------|---------------|---------------|---------------|---------------|---------------|---------------|---------------|---------------|---------------|---------------|---------------|---------------|
|                     | A             | B             | C             | D             | E             | F             | G             | H             | I             | J             | K             | L             | M             | N             | O             | P             | Q             | R             | S             | T             |
| <b>Cyclics</b>      |               |               |               |               |               |               |               |               |               |               |               |               |               |               |               |               |               |               |               |               |
| $\alpha$ -Pinene    | -             | -             | -             | -             | -             | -             | -             | -             | 0.24          | -             | -             | -             | -             | 1.25          | -             | 0.13          | -             | -             | -             | -             |
| $\beta$ -Pinene     | 19.79         | -             | -             | -             | 3.68          | -             | -             | -             | -             | 0.21          | -             | 0.11          | 0.14          | 1.55          | -             | -             | 0.34          | -             | -             | 3.68          |
| Phellandrene        | 6.96          | 0.15          | 0.39          | 0.06          | 0.77          | 1.87          | -             | -             | -             | 0.22          | 1.17          | 0.28          | 0.25          | 0.16          | 0.20          | 0.45          | -             | 0.56          | 1.89          | 0.58          |
| D-Limonene          | 42.63         | 2.43          | 3.38          | 34.55         | 16.12         | 14.98         | 7.32          | 21.96         | 25.70         | 1.23          | 4.95          | 6.03          | 4.20          | 100.27        | 0.62          | 21.95         | 21.35         | 32.61         | 40.92         | 7.79          |
| $\gamma$ -Terpinene | 4.33          | 0.18          | 0.98          | 0.93          | 1.02          | 2.38          | 0.29          | 0.69          | 0.68          | 1.46          | 0.90          | -             | 0.44          | 2.77          | -             | 2.49          | 0.58          | 0.97          | 4.50          | 0.86          |
| P-Cymene            | 1.82          | 0.17          | 0.40          | 0.29          | 0.77          | 0.90          | 0.18          | 0.24          | 0.21          | 0.44          | 0.84          | 0.31          | 0.27          | 0.79          | 0.21          | 0.60          | 0.30          | 0.47          | 0.96          | 0.35          |
| Terpinolene         | 11.67         | 0.45          | 3.44          | 0.45          | 5.29          | 16.02         | 0.13          | 0.44          | 0.25          | 1.09          | 2.36          | 0.83          | 0.93          | 0.50          | 0.74          | 3.07          | 0.27          | 2.42          | 13.48         | 4.27          |
| 4-Terpineol         | 4.40          | 0.40          | 0.56          | -             | 0.29          | 1.32          | -             | -             | -             | 1.84          | 0.34          | 1.15          | 1.78          | -             | 1.08          | 2.44          | -             | -             | 0.87          | 0.66          |
| $\alpha$ -Terpineol | 98.07         | 0.22          | 22.58         | 0.42          | 35.70         | 122.36        | 0.26          | 0.54          | 0.42          | 1.42          | 19.75         | 0.56          | 1.77          | -             | 0.08          | 8.67          | 1.12          | 13.26         | 103.96        | 31.43         |
| Myrtenol            | -             | -             | -             | 0.16          | -             | -             | -             | -             | -             | -             | -             | -             | 0.11          | -             | -             | 0.26          | -             | -             | -             | -             |
| SubTOTAL            | 189.67        | 4.00          | 31.73         | 36.86         | 63.64         | 159.83        | 8.18          | 23.87         | 27.50         | 7.91          | 30.31         | 9.27          | 9.89          | 107.29        | 2.93          | 40.06         | 23.96         | 50.29         | 166.58        | 49.62         |
| %                   | <b>2.71%</b>  | <b>9.32%</b>  | <b>1.06%</b>  | <b>53.19%</b> | <b>2.16%</b>  | <b>2.01%</b>  | <b>37.23%</b> | <b>63.84%</b> | <b>31.95%</b> | <b>16.00%</b> | <b>1.72%</b>  | <b>23.40%</b> | <b>29.09%</b> | <b>97.34%</b> | <b>8.62%</b>  | <b>21.03%</b> | <b>81.33%</b> | <b>1.01%</b>  | <b>1.73%</b>  | <b>1.25%</b>  |
| <b>Acyclics</b>     |               |               |               |               |               |               |               |               |               |               |               |               |               |               |               |               |               |               |               |               |
| RoseoxideII (cis)   | 1.30          | -             | -             | -             | -             | -             | -             | -             | -             | -             | -             | -             | -             | -             | -             | -             | -             | -             | -             | -             |
| RoseoxideI (trans)  | 1.81          | -             | 0.08          | -             | 0.21          | 0.26          | -             | 0.03          | -             | -             | -             | 0.14          | 0.09          | -             | -             | -             | -             | -             | 0.14          | 0.08          |
| Nerol oxide         | 3.36          | -             | 1.15          | 0.11          | 1.29          | 7.30          | -             | 0.06          | -             | -             | -             | -             | -             | -             | -             | -             | -             | 0.21          | 1.86          | 2.98          |
| Linalool            | 278.88        | 0.13          | 71.47         | 0.20          | 132.88        | 267.03        | 0.80          | 0.07          | 0.16          | 0.56          | 40.54         | 0.28          | 0.70          | 0.23          | 1.18          | 1.40          | 0.15          | 31.88         | 208.45        | 45.29         |
| Hotrienol           | 1.01          | -             | 0.51          | -             | 1.94          | 9.17          | -             | -             | -             | 0.11          | -             | -             | -             | -             | -             | -             | -             | 0.16          | 0.68          | 0.61          |
| Neral               | 47.11         | -             | 17.26         | -             | 9.55          | 45.11         | -             | -             | 0.61          | -             | 9.77          | -             | 2.01          | -             | -             | 3.78          | -             | 17.72         | 53.41         | 7.51          |
| $\beta$ -Myrcene    | 3.14          | 0.79          | 3.05          | 2.07          | -             | 12.13         | 0.93          | 1.18          | 1.32          | -             | 5.08          | -             | -             | 2.70          | -             | 1.73          | 0.86          | 9.17          | 27.75         | 4.67          |
| Geranial            | 40.42         | 0.48          | 30.76         | 1.08          | 18.28         | 62.81         | 0.45          | 0.30          | 1.48          | 1.52          | 14.15         | 1.09          | 4.49          | -             | 1.51          | 7.20          | -             | 37.45         | 108.95        | 16.22         |
| Citronellol         | 398.87        | 3.17          | 6.27          | 0.65          | 19.45         | 50.57         | 1.14          | 1.36          | 0.17          | -             | 0.68          | 4.90          | 2.25          | -             | 5.06          | 3.10          | -             | 18.03         | 39.56         | 5.59          |
| Nerol               | 813.02        | 1.80          | 77.06         | 2.17          | 83.06         | 611.74        | 0.79          | 1.21          | 0.40          | 6.31          | 64.84         | 7.37          | 4.54          | -             | 4.70          | 25.83         | -             | 181.17        | 569.48        | 302.87        |
| Geraniol            | 1883.53       | 5.00          | 145.33        | -             | 203.33        | 905.46        | 6.39          | 6.49          | 4.17          | 10.20         | 313.27        | 14.85         | 10.03         | -             | 5.32          | 32.29         | -             | 651.52        | 2426.78       | 625.07        |
| E-Nerolidol         | -             | -             | -             | -             | 0.42          | -             | -             | -             | -             | -             | 0.16          | -             | -             | -             | -             | -             | -             | 0.18          | -             | 0.39          |
| Geranic acid        | 3334.14       | 27.57         | 2614.39       | 26.16         | 2418.64       | 5815.51       | 3.29          | 2.82          | 50.26         | 22.95         | 1279.92       | 1.72          | -             | -             | 13.31         | 75.14         | 4.79          | 3996.61       | 6040.71       | 2906.19       |
| SubTOTAL            | 6806.59       | 38.94         | 2967.33       | 32.44         | 2889.05       | 7787.09       | 13.79         | 13.52         | 58.57         | 41.54         | 1728.52       | 30.35         | 24.11         | 2.93          | 31.08         | 150.47        | 5.50          | 4944.10       | 9477.77       | 3917.47       |
| %                   | <b>97.29%</b> | <b>90.68%</b> | <b>98.94%</b> | <b>46.81%</b> | <b>97.84%</b> | <b>97.99%</b> | <b>62.77%</b> | <b>36.16%</b> | <b>68.05%</b> | <b>84.00%</b> | <b>98.28%</b> | <b>76.60%</b> | <b>70.91%</b> | <b>2.66%</b>  | <b>91.38%</b> | <b>78.97%</b> | <b>18.67%</b> | <b>98.99%</b> | <b>98.27%</b> | <b>98.75%</b> |
| TOTAL terpenes      | 6996.26       | 42.94         | 2999.06       | 69.30         | 2952.69       | 7946.92       | 21.97         | 37.39         | 86.07         | 49.45         | 1758.83       | 39.62         | 34.00         | 110.22        | 34.01         | 190.53        | 32.18         | 4994.39       | 9644.35       | 3967.09       |
| % <sup>a</sup>      | <b>99.93%</b> | <b>97.28%</b> | <b>99.94%</b> | <b>98.79%</b> | <b>99.85%</b> | <b>99.95%</b> | <b>94.66%</b> | <b>98.06%</b> | <b>98.79%</b> | <b>95.22%</b> | <b>99.89%</b> | <b>93.22%</b> | <b>94.92%</b> | <b>96.87%</b> | <b>93.38%</b> | <b>98.65%</b> | <b>91.55%</b> | <b>99.96%</b> | <b>99.97%</b> | <b>99.94%</b> |

**Table S2. Concentrations ( $\mu\text{g}/\text{kg}$ ) of monoterpenes determined in skin of table grapes.** Data are shown as the means ( $n=3$ ). %<sup>a</sup>indicated that percentage of monoterpenes contents account for the total terpenes contents. - indicated that the compound was not detected. Capital letters refer to the table grape cultivars listed in Figure 1.

| Compounds                      | Cultivars      |                |               |                |                |               |                |                |               |                |               |                |                |               |                |                |                |                |               |               |
|--------------------------------|----------------|----------------|---------------|----------------|----------------|---------------|----------------|----------------|---------------|----------------|---------------|----------------|----------------|---------------|----------------|----------------|----------------|----------------|---------------|---------------|
|                                | A              | B              | C             | D              | E              | F             | G              | H              | I             | J              | K             | L              | M              | N             | O              | P              | Q              | R              | S             | T             |
| <b>Fatty acids derivatives</b> |                |                |               |                |                |               |                |                |               |                |               |                |                |               |                |                |                |                |               |               |
| Hexanal                        | 277.62         | 39.26          | 71.45         | 139.15         | 150.22         | 48.50         | 249.16         | 103.39         | 135.58        | 75.12          | 90.66         | 27.46          | 43.82          | 46.29         | 61.18          | 4.32           | 146.97         | 314.54         | 82.12         | 131.88        |
| (Z)-3-Hexenal                  | 0.39           | 0.12           | -             | 0.12           | 0.22           | -             | 0.59           | 0.24           | 0.64          | 0.26           | 0.02          | 0.15           | -              | 0.19          | 0.13           | -              | 0.37           | 2.19           | 0.06          | -             |
| (E)-2-Hexenal                  | 534.42         | 169.69         | 79.17         | 199.95         | 389.06         | 99.26         | 623.62         | 364.12         | 193.04        | 313.78         | 111.36        | 238.60         | 87.26          | 151.93        | 294.90         | 71.41          | 422.06         | 432.37         | 81.73         | 480.76        |
| Hexanol                        | 53.22          | 28.12          | 88.24         | 318.42         | 223.00         | 26.75         | 36.21          | 20.64          | 27.38         | 81.28          | 83.31         | 45.83          | 45.57          | 91.46         | 36.13          | 67.90          | 300.87         | 141.66         | 85.90         | 25.61         |
| (E)-3-Hexenol                  | -              | -              | -             | -              | -              | -             | -              | -              | -             | 2.72           | 1.94          | -              | 5.74           | 2.47          | 12.79          | 1.72           | 5.15           | 2.14           | 7.25          | 1.13          |
| (Z)-3-Hexenol                  | 3.65           | 10.68          | 19.87         | 116.70         | 200.56         | 13.09         | 7.16           | 15.61          | 37.65         | 1.56           | 3.72          | 15.29          | -              | 11.75         | -              | 21.15          | 39.70          | 56.28          | -             | 0.77          |
| (E)-2-Hexenol                  | 86.89          | 43.95          | 80.16         | 343.26         | 265.99         | 53.38         | 33.94          | 26.92          | 66.42         | 159.48         | 137.06        | 117.28         | 58.42          | 47.40         | 50.97          | 133.70         | 425.67         | 128.49         | 102.00        | 61.81         |
| 1-Octen-3-ol                   | 1.57           | 0.26           | 0.22          | 0.42           | 0.36           | 0.27          | 0.16           | 0.19           | 0.19          | 1.04           | 0.40          | 0.23           | 0.22           | 0.55          | 0.21           | 0.88           | 0.22           | 0.29           | 0.05          | -             |
| Heptanol                       | -              | 0.35           | 0.32          | 0.46           | 0.98           | 0.31          | 0.33           | 0.36           | 0.30          | 1.07           | 0.34          | 0.34           | 0.32           | 0.24          | 0.36           | 0.47           | -              | 0.29           | 0.18          | 0.23          |
| Octanol                        | 1.16           | 0.58           | 0.16          | 0.86           | 0.44           | 0.61          | -              | 0.71           | 0.39          | 1.17           | 0.33          | 0.39           | 0.85           | 0.50          | 0.53           | 0.93           | 0.10           | 0.36           | 0.28          | 0.12          |
| Nonanol                        | 0.63           | 0.45           | 0.23          | 0.35           | 0.42           | 0.26          | 0.18           | 0.25           | 0.18          | 2.97           | 0.22          | 0.40           | 0.37           | 0.14          | 0.46           | 0.54           | -              | -              | 0.22          | 0.17          |
| Ethyl acetate                  | 4784.86        | 2129.60        | 6.94          | 20.47          | -              | 35.21         | 21.48          | 1358.21        | 5.92          | 2823.63        | 51.70         | 3823.30        | 1642.77        | 21.45         | 3773.93        | 3875.26        | 102.16         | -              | 17.75         | 13.05         |
| Ethyl Propionate               | 1.32           | -              | -             | -              | -              | -             | -              | 0.54           | -             | 0.45           | -             | 0.89           | 0.44           | -             | 1.23           | 1.10           | -              | -              | -             | -             |
| Propyl acetate                 | -              | 0.33           | -             | -              | -              | -             | -              | -              | -             | 0.30           | -             | 0.29           | 0.05           | -             | 0.34           | 0.36           | -              | -              | -             | -             |
| Ethyl butyrate                 | 69.14          | 0.37           | -             | -              | -              | -             | -              | -              | -             | 54.91          | -             | 62.18          | 33.98          | -             | 67.95          | 82.60          | -              | -              | -             | -             |
| Butyl acetate                  | -              | 0.05           | 0.08          | 0.10           | 0.15           | 0.06          | 0.07           | 0.04           | 0.03          | 0.11           | 0.06          | 0.04           | 0.05           | 0.22          | 0.10           | 0.11           | 0.06           | 0.03           | 0.02          | 0.07          |
| Ethyl pentanoate               | 1.89           | -              | -             | -              | -              | -             | -              | 1.08           | -             | -              | -             | 0.97           | -              | -             | 2.41           | 2.53           | -              | -              | -             | -             |
| Ethyl hexanoate                | 19.55          | 4.99           | -             | 2.10           | -              | -             | -              | 6.71           | 2.40          | 12.34          | -             | 23.40          | 13.14          | 1.68          | 18.10          | 42.47          | 2.02           | -              | -             | -             |
| Hexyl acetate                  | -              | 0.05           | -             | 0.14           | 0.11           | -             | 0.02           | 0.01           | -             | 0.11           | -             | -              | 0.40           | 0.02          | 0.04           | 1.20           | 1.36           | 0.04           | -             | 0.14          |
| (Z)-3-Hexenyl acetate          | -              | -              | -             | 0.45           | 1.05           | -             | -              | -              | 0.27          | -              | -             | -              | -              | -             | -              | 0.63           | -              | -              | -             | -             |
| Ethyl heptanoate               | 0.43           | -              | -             | -              | -              | -             | -              | 0.09           | -             | 0.52           | -             | 0.50           | -              | -             | 0.72           | -              | -              | -              | -             | -             |
| Hexanoic acid                  | 1.81           | 1.83           | 4.09          | 3.13           | 3.11           | 1.61          | 1.25           | 0.47           | 2.31          | 0.71           | 1.58          | 1.72           | 1.81           | 0.79          | 0.72           | 1.45           | 1.36           | 2.69           | -             | 0.68          |
| 2-Hexenoic acid                | 15.32          | 20.71          | 44.86         | 46.39          | 61.26          | 20.42         | 25.10          | 11.07          | 29.54         | 11.51          | 36.88         | 13.90          | 22.98          | 21.29         | 15.08          | 26.07          | 20.76          | 34.88          | 32.11         | 20.83         |
| Octanoic acid                  | 0.80           | 0.51           | 0.57          | 0.56           | 0.29           | 0.32          | 0.18           | 0.07           | 0.03          | 0.29           | 0.12          | 0.33           | 0.14           | 0.02          | 0.67           | 0.74           | 0.38           | 0.11           | 0.30          | 0.43          |
| SubTOTAL                       | 17.92          | 23.05          | 49.52         | 50.08          | 64.66          | 22.35         | 26.53          | 11.60          | 31.88         | 12.52          | 38.57         | 15.95          | 24.93          | 22.10         | 16.48          | 28.27          | 22.49          | 37.68          | 32.41         | 21.94         |
| Pentanal                       | 9.40           | -              | -             | 1.14           | -              | 0.87          | -              | -              | -             | -              | 0.57          | -              | -              | -             | -              | -              | -              | -              | -             | -             |
| Octanal                        | 0.96           | 0.51           | 0.62          | 0.72           | 0.95           | 0.44          | 0.31           | 0.39           | 0.37          | 0.39           | 0.28          | 0.42           | 0.44           | -             | 0.30           | 0.23           | 0.44           | 0.56           | 0.49          | 0.42          |
| Nonanal                        | 17.20          | 5.81           | 6.08          | 15.70          | 15.93          | 13.16         | 8.37           | 11.81          | 10.53         | 14.74          | 7.10          | 12.05          | 14.81          | 11.16         | 10.78          | 7.69           | 9.46           | 11.90          | 12.45         | 10.05         |
| <b>SubTOTAL</b>                | <b>5900.15</b> | <b>2481.27</b> | <b>452.58</b> | <b>1260.67</b> | <b>1378.76</b> | <b>336.87</b> | <b>1034.66</b> | <b>1934.52</b> | <b>545.05</b> | <b>3572.98</b> | <b>566.22</b> | <b>4401.91</b> | <b>1998.51</b> | <b>431.65</b> | <b>4366.51</b> | <b>4373.73</b> | <b>1501.60</b> | <b>1166.50</b> | <b>455.32</b> | <b>770.09</b> |
| <b>%</b>                       | <b>90.25%</b>  | <b>98.18%</b>  | <b>66.70%</b> | <b>98.16%</b>  | <b>75.58%</b>  | <b>58.35%</b> | <b>98.69%</b>  | <b>99.32%</b>  | <b>97.86%</b> | <b>97.52%</b>  | <b>88.31%</b> | <b>99.60%</b>  | <b>99.35%</b>  | <b>99.36%</b> | <b>99.60%</b>  | <b>99.41%</b>  | <b>95.51%</b>  | <b>87.22%</b>  | <b>49.12%</b> | <b>89.79%</b> |
| <b>Isoprenoid derivatives</b>  |                |                |               |                |                |               |                |                |               |                |               |                |                |               |                |                |                |                |               |               |
| $\alpha$ -Pinene               | -              | -              | -             | -              | -              | -             | -              | -              | -             | -              | -             | -              | -              | -             | -              | -              | 1.05           | 0.71           | -             | -             |
| Phellandrene                   | 0.47           | 0.17           | 0.21          | -              | 0.59           | 0.23          | -              | 0.20           | -             | 0.26           | 0.17          | 0.46           | 0.74           | -             | 0.23           | 0.44           | -              | -              | 0.63          | 0.25          |
| $\beta$ -Myrcene               | 5.50           | 2.37           | -             | -              | -              | -             | -              | -              | -             | -              | -             | -              | -              | -             | -              | -              | -              | 2.52           | -             | -             |
| D-Limonene                     | 42.74          | 26.55          | 6.16          | 0.13           | 2.27           | 2.06          | -              | -              | -             | -              | -             | -              | -              | -             | -              | -              | 59.44          | 44.93          | 21.34         | 11.13         |
| $\gamma$ -Terpinene            | 3.38           | 0.89           | -             | -              | -              | -             | -              | 0.34           | -             | 0.53           | -             | 1.20           | 1.61           | -             | 0.59           | -              | 1.10           | 0.93           | -             | 0.54          |
| P-Cymene                       | 0.39           | 0.23           | 0.27          | -              | -              | -             | -              | 0.02           | -             | 0.12           | -             | 0.11           | 0.41           | -             | 0.07           | 0.15           | 0.10           | 0.03           | 0.16          | 0.05          |
| Terpinolene                    | 0.95           | 0.23           | 2.30          | -              | 1.88           | 1.82          | -              | 0.16           | -             | 0.19           | 0.18          | -              | 0.49           | -             | 0.36           | 0.45           | -              | 0.39           | 4.94          | 1.00          |
| Rose oxide II (cis)            | 4.85           | 0.13           | -             | -              | -              | -             | -              | -              | -             | -              | -             | -              | -              | -             | -              | -              | -              | -              | -             | -             |
| Rose oxide I (trans)           | 1.28           | -              | -             | -              | 0.60           | 0.18          | -              | -              | -             | -              | -             | -              | -              | -             | -              | -              | -              | -              | -             | -             |
| Nerol oxide                    | -              | -              | -             | -              | -              | 3.76          | -              | -              | -             | -              | -             | -              | -              | -             | -              | -              | -              | -              | -             | 1.12          |
| Linalool                       | 310.40         | 0.80           | 123.02        | -              | 328.13         | 137.82        | 0.17           | -              | -             | -              | 2.32          | -              | -              | -             | -              | -              | -              | 3.14           | 290.69        | 10.19         |
| 4-Terpineol                    | 4.98           | 0.35           | 0.25          | -              | -              | 0.25          | -              | 0.54           | -             | 3.12           | -             | 1.19           | 2.59           | -             | 1.19           | 1.44           | -              | -              | 0.89          | 0.19          |
| Hotrienol                      | 3.11           | -              | 1.84          | -              | 4.41           | 11.39         | 0.04           | -              | -             | -              | -             | -              | -              | -             | -              | -              | -              | -              | 2.33          | 3.77          |

|                                |               |              |               |              |               |               |              |              |              |              |               |              |              |              |              |              |              |               |               |              |
|--------------------------------|---------------|--------------|---------------|--------------|---------------|---------------|--------------|--------------|--------------|--------------|---------------|--------------|--------------|--------------|--------------|--------------|--------------|---------------|---------------|--------------|
| Neral                          | 3.71          | -            | -             | -            | -             | 0.72          | -            | -            | -            | -            | 1.75          | -            | -            | -            | -            | -            | 2.20         | 1.25          | 0.17          |              |
| $\alpha$ -Terpineol            | 36.74         | 0.61         | 18.20         | 0.50         | 16.11         | 18.92         | 0.53         | 0.52         | 0.36         | 0.63         | 0.91          | 0.53         | 0.64         | 0.28         | 1.07         | 1.13         | 0.32         | 1.30          | 39.32         | 4.15         |
| Geranial                       | 7.90          | 0.49         | 0.75          | 0.24         | 1.44          | 1.76          | 0.47         | -            | -            | -            | 3.12          | 0.19         | -            | -            | -            | 0.47         | -            | 3.64          | 2.68          | 0.84         |
| Citronellol                    | 21.91         | -            | -             | -            | 4.20          | 1.55          | 1.21         | 1.24         | 1.15         | 1.95         | 1.29          | 1.34         | 1.20         | -            | 1.51         | 1.57         | -            | 2.18          | 1.57          | 1.18         |
| Nerol                          | 22.51         | 2.29         | 8.07          | 2.44         | 12.16         | 12.88         | -            | 2.15         | 2.10         | 2.49         | 7.49          | 2.27         | -            | -            | -            | 4.46         | -            | 11.38         | 17.02         | 6.05         |
| Geraniol                       | 128.68        | 3.12         | 20.50         | 2.69         | 20.96         | 27.29         | 2.74         | 2.60         | 2.42         | 2.66         | 35.45         | 2.75         | -            | -            | 2.76         | 5.68         | -            | 51.91         | 73.46         | 23.51        |
| Cedrol                         | -             | 0.69         | 0.87          | 0.27         | 1.57          | 0.47          | 1.35         | 1.14         | 0.85         | 1.24         | 0.57          | 0.86         | 0.57         | 0.45         | 1.02         | 0.48         | 0.61         | 0.41          | 0.39          | 0.36         |
| Geranic acid                   | 33.04         | 1.98         | 38.52         | 3.17         | 22.96         | 15.78         | 1.69         | 1.50         | 1.15         | 1.54         | 16.67         | -            | -            | -            | 1.48         | -            | 43.37        | 10.92         | 20.38         |              |
| $\beta$ -Damascenone           | 0.01          | 0.01         | 0.11          | 0.07         | 0.01          | 0.04          | 0.14         | 0.17         | 0.01         | 0.09         | 0.02          | 0.03         | 0.05         | 0.01         | 0.18         | 0.01         | 0.01         | 0.01          | 0.04          | 0.07         |
| Geranyl acetone                | -             | -            | -             | -            | -             | -             | -            | -            | -            | -            | 0.34          | 0.19         | 0.07         | 0.17         | 0.08         | 0.14         | 0.28         | 0.35          | 0.12          |              |
| $\beta$ -Ionone                | 0.10          | -            | -             | 0.08         | 0.17          | 0.05          | 0.08         | 0.07         | 0.06         | 0.07         | -             | 0.07         | 0.06         | 0.06         | 0.08         | -            | 0.07         | 0.07          | 0.06          | 0.06         |
| <b>SubTOTAL</b>                | <b>632.64</b> | <b>41.33</b> | <b>221.51</b> | <b>10.36</b> | <b>418.66</b> | <b>237.25</b> | <b>8.54</b>  | <b>10.75</b> | <b>8.78</b>  | <b>14.88</b> | <b>70.00</b>  | <b>11.34</b> | <b>8.92</b>  | <b>0.86</b>  | <b>9.43</b>  | <b>17.85</b> | <b>62.85</b> | <b>169.47</b> | <b>468.74</b> | <b>85.26</b> |
| <b>%</b>                       | <b>9.68%</b>  | <b>1.64%</b> | <b>32.65%</b> | <b>0.81%</b> | <b>22.95%</b> | <b>41.10%</b> | <b>0.81%</b> | <b>0.55%</b> | <b>1.58%</b> | <b>0.41%</b> | <b>10.92%</b> | <b>0.26%</b> | <b>0.44%</b> | <b>0.20%</b> | <b>0.22%</b> | <b>0.41%</b> | <b>4.00%</b> | <b>12.67%</b> | <b>50.57%</b> | <b>9.94%</b> |
| <b>Amino acids derivatives</b> |               |              |               |              |               |               |              |              |              |              |               |              |              |              |              |              |              |               |               |              |
| 2-Ethyl hexanol                | 1.67          | 1.31         | 1.92          | 1.76         | 3.79          | 1.18          | 1.23         | 1.19         | 2.16         | 1.56         | 1.56          | 1.39         | 1.55         | 1.40         | 1.63         | 0.90         | 1.26         | 0.96          | 1.58          | 1.04         |
| Phenylethyl alcohol            | 1.23          | 1.69         | 0.20          | 0.28         | 0.19          | -             | -            | 0.29         | 0.03         | 60.63        | 1.19          | 1.27         | 0.19         | -            | 0.43         | 2.46         | 0.45         | 0.08          | 0.04          | -            |
| Ethyl isobutyrate              | -             | -            | -             | -            | -             | -             | -            | -            | -            | -            | 0.34          | 0.18         | -            | -            | 0.38         | 0.35         | -            | -             | -             | -            |
| Ethyl 3-methylbutanoate        | -             | -            | -             | -            | -             | -             | -            | -            | -            | 0.11         | -             | -            | -            | -            | 0.17         | -            | -            | -             | -             | -            |
| Ethyl 3-hydroxybutyrate        | 1.13          | -            | -             | -            | -             | -             | -            | -            | -            | 2.65         | -             | 0.67         | -            | -            | 0.54         | -            | -            | -             | -             | -            |
| Methyl salicylate              | 0.23          | 0.26         | -             | 0.40         | 1.19          | 0.05          | 1.93         | 0.21         | 0.13         | 0.15         | -             | 0.07         | 0.69         | 0.02         | 4.20         | 0.74         | 0.41         | 0.30          | 0.40          | 0.62         |
| 2-Methylbutanal                | -             | -            | 0.24          | 0.35         | 1.13          | 0.14          | 0.11         | -            | 0.12         | -            | 0.11          | -            | -            | -            | -            | 0.42         | -            | 0.17          | -             | -            |
| 3-Methylbutanal                | -             | -            | 0.47          | 0.67         | 5.30          | 0.28          | 0.27         | -            | 0.18         | -            | 0.22          | -            | -            | 0.08         | -            | 0.98         | -            | 0.28          | -             | -            |
| Benzaldehyde                   | 0.42          | 0.49         | 1.16          | 8.90         | 11.14         | 1.37          | 1.33         | 0.10         | 0.50         | 6.78         | 1.64          | 0.88         | 0.74         | 0.30         | 0.74         | 2.48         | 0.45         | -             | -             | 0.48         |
| Phenylacetaldehyde             | -             | 0.93         | 0.44          | 0.86         | 4.12          | 0.16          | 0.36         | 0.65         | -            | 3.93         | 0.23          | 1.51         | 0.76         | 0.12         | 0.51         | 0.28         | 3.85         | 0.07          | 0.35          | 0.14         |
| <b>SubTOTAL</b>                | <b>4.68</b>   | <b>4.68</b>  | <b>4.43</b>   | <b>13.22</b> | <b>26.86</b>  | <b>3.18</b>   | <b>5.23</b>  | <b>2.44</b>  | <b>3.12</b>  | <b>75.81</b> | <b>4.95</b>   | <b>6.13</b>  | <b>4.11</b>  | <b>1.92</b>  | <b>7.89</b>  | <b>7.92</b>  | <b>7.82</b>  | <b>1.41</b>   | <b>2.82</b>   | <b>2.28</b>  |
| <b>%</b>                       | <b>0.07%</b>  | <b>0.19%</b> | <b>0.65%</b>  | <b>1.03%</b> | <b>1.47%</b>  | <b>0.55%</b>  | <b>0.50%</b> | <b>0.13%</b> | <b>0.56%</b> | <b>2.07%</b> | <b>0.77%</b>  | <b>0.14%</b> | <b>0.20%</b> | <b>0.44%</b> | <b>0.18%</b> | <b>0.18%</b> | <b>0.50%</b> | <b>0.11%</b>  | <b>0.30%</b>  | <b>0.27%</b> |

**Table S3. Concentrations ( $\mu\text{g}/\text{kg}$ ) of volatile compounds from different synthesis pathways determined in pulp juice of table grapes.** Data are shown as the means ( $n=3$ ). - indicated that the compound was not detected. Capital letters refer to the table grape cultivars listed in Figure 1.

| Compounds                      | Cultivars      |               |               |               |                |               |               |               |               |                |                |                |               |               |                |                |               |               |               |               |
|--------------------------------|----------------|---------------|---------------|---------------|----------------|---------------|---------------|---------------|---------------|----------------|----------------|----------------|---------------|---------------|----------------|----------------|---------------|---------------|---------------|---------------|
|                                | A              | B             | C             | D             | E              | F             | G             | H             | I             | J              | K              | L              | M             | N             | O              | P              | Q             | R             | S             | T             |
| <b>Fatty acids derivatives</b> |                |               |               |               |                |               |               |               |               |                |                |                |               |               |                |                |               |               |               |               |
| Hexanal                        | 504.30         | 93.18         | 78.18         | 134.57        | 314.69         | 174.58        | 198.05        | 117.08        | 88.41         | 207.41         | 106.19         | 235.38         | 116.34        | 143.64        | 140.32         | 185.85         | 198.34        | 186.25        | 267.30        | 131.10        |
| (Z)-3-Hexenal                  | 1.06           | 0.24          | 0.05          | 0.47          | 1.19           | -             | 0.76          | 0.39          | 0.38          | 0.14           | -              | 0.65           | 0.40          | 0.79          | 0.31           | 0.54           | 0.65          | 0.73          | 0.23          | 0.13          |
| (E)-2-Hexenal                  | 976.35         | 207.02        | 232.73        | 338.70        | 790.85         | 508.46        | 457.79        | 310.21        | 216.75        | 393.15         | 107.89         | 508.18         | 341.91        | 459.53        | 405.24         | 473.56         | 445.87        | 435.66        | 514.55        | 389.09        |
| Hexanol                        | 13.22          | 104.17        | 18.46         | 64.31         | 59.65          | 18.26         | 44.56         | 45.52         | 117.83        | 177.41         | 226.16         | 58.81          | 42.36         | 82.63         | 16.22          | 74.09          | 93.85         | 30.20         | 32.13         | 8.64          |
| (E)-3-Hexenol                  | -              | 2.71          | -             | 1.08          | -              | -             | -             | -             | 1.93          | 3.62           | 5.94           | -              | -             | -             | -              | -              | 1.71          | -             | -             | -             |
| (Z)-3-Hexenol                  | 4.28           | 4.11          | 1.69          | 23.43         | 41.87          | 4.31          | 1.54          | 10.00         | 8.81          | 2.29           | 1.13           | 11.43          | 6.23          | 7.05          | 5.16           | 16.18          | 19.24         | 13.28         | 6.69          | 0.61          |
| (E)-2-Hexenol                  | 52.99          | 239.15        | 25.81         | 61.16         | 58.93          | 39.23         | 63.05         | 54.30         | 263.49        | 240.87         | 108.55         | 107.41         | 75.19         | 52.43         | 25.79          | 98.07          | 143.52        | 46.75         | 55.85         | 26.03         |
| 2-Heptanol                     | -              | -             | -             | 0.26          | -              | -             | 0.33          | 0.29          | -             | -              | -              | -              | -             | -             | -              | -              | -             | -             | -             | -             |
| 1-Octen-3-ol                   | 0.36           | 0.47          | 0.34          | 0.54          | 0.71           | 0.33          | 0.42          | 0.35          | 0.35          | 1.67           | 0.88           | 2.10           | 0.60          | 0.74          | 0.99           | 5.05           | 0.30          | 0.43          | 0.21          | 0.21          |
| Heptanol                       | 0.40           | 0.69          | 0.30          | 0.57          | 0.65           | -             | 0.39          | 0.40          | 0.33          | 2.97           | 0.51           | 1.25           | 0.62          | 0.75          | 0.62           | 1.31           | 0.53          | 0.54          | 0.71          | 0.32          |
| Octanol                        | 1.69           | 0.77          | 0.19          | 0.97          | 0.70           | 0.56          | 0.58          | 0.49          | 0.40          | 1.26           | 0.16           | 1.69           | 0.90          | 0.72          | 1.67           | 2.60           | 0.31          | 0.93          | 0.87          | 0.34          |
| Nonanol                        | 1.49           | 0.58          | 0.13          | 0.78          | 0.37           | 0.47          | 0.39          | 0.45          | 0.35          | 1.42           | 0.45           | 1.70           | 0.73          | 0.36          | 2.70           | 2.15           | 0.16          | 0.70          | 1.17          | 0.20          |
| Ethyl acetate                  | 850.97         | 134.41        | 4.36          | 2.59          | 15.22          | 7.11          | 7.03          | 82.14         | 3.54          | 1949.87        | 575.90         | 1245.11        | 103.45        | 72.75         | 1746.41        | 1242.30        | 1.99          | 10.20         | 6.79          | 7.34          |
| Ethyl Propionate               | -              | -             | -             | -             | -              | -             | -             | -             | -             | 0.26           | -              | 0.09           | -             | -             | 0.15           | 0.32           | -             | -             | -             | -             |
| Propyl acetate                 | -              | -             | -             | -             | -              | -             | -             | -             | -             | 0.11           | -              | -              | -             | -             | 0.02           | 0.09           | -             | -             | -             | -             |
| Ethyl butyrate                 | 3.92           | -             | -             | -             | -              | -             | -             | 1.41          | -             | 21.97          | -              | 8.62           | 1.36          | -             | 4.96           | 18.63          | -             | -             | -             | -             |
| Butyl acetate                  | -              | 0.04          | 0.05          | 0.11          | 0.16           | 0.06          | -             | 0.03          | 0.02          | 0.12           | 0.27           | 0.09           | 0.04          | 0.45          | 0.05           | 0.09           | 0.07          | 0.04          | 0.06          | -             |
| Ethyl hexanoate                | 15.07          | 1.70          | -             | 1.75          | -              | -             | 1.60          | 2.66          | 1.56          | 25.81          | -              | 10.52          | 4.32          | 4.50          | 7.36           | 19.48          | 3.26          | -             | -             | -             |
| Hexyl acetate                  | -              | -             | 0.22          | 0.02          | 0.19           | -             | -             | 0.24          | -             | 0.10           | 1.30           | -              | -             | 0.37          | -              | 0.36           | 0.11          | -             | -             | -             |
| Ethyl heptanoate               | -              | -             | -             | -             | -              | -             | -             | -             | -             | 0.79           | -              | -              | -             | -             | 0.44           | -              | -             | -             | -             | -             |
| Ethyl octanoate                | 2.77           | -             | -             | -             | -              | -             | -             | -             | -             | 1.10           | -              | 0.83           | -             | -             | -              | -              | -             | -             | -             | -             |
| Hexanoic acid                  | -              | 0.20          | -             | 2.04          | -              | -             | -             | -             | 0.85          | -              | -              | -              | 0.84          | 1.14          | -              | -              | 1.21          | -             | -             | -             |
| 2-Hexenoic acid                | -              | 20.71         | 44.14         | 39.89         | 77.58          | 88.58         | -             | 26.62         | -             | -              | 24.84          | -              | 56.29         | -             | 30.71          | 41.32          | 25.61         | 30.28         | 56.32         | 36.58         |
| Octanoic acid                  | -              | -             | -             | 0.32          | -              | -             | -             | -             | -             | 0.15           | 0.89           | -              | -             | -             | -              | 0.71           | -             | -             | -             | -             |
| Pentanal                       | 4.24           | 1.59          | 0.45          | 0.81          | 1.80           | 1.09          | 1.06          | 1.32          | -             | 0.56           | -              | 2.40           | 1.28          | -             | 0.95           | -              | 1.39          | 0.37          | 2.57          | 1.32          |
| Octanal                        | 0.53           | 0.19          | 0.26          | 0.29          | 1.02           | 0.52          | 0.87          | 0.37          | 0.22          | 0.68           | 0.25           | 0.62           | 0.25          | 1.67          | 0.23           | 0.47           | 0.76          | 0.31          | 0.66          | 0.37          |
| Nonanal                        | -              | 1.13          | 2.02          | 0.73          | 4.07           | 8.99          | 1.62          | 1.14          | 0.95          | 3.17           | 0.68           | 1.87           | 1.19          | 4.61          | 3.77           | 1.49           | 1.97          | 3.05          | -             | 4.80          |
| (E)-2-Octenal                  | -              | -             | 0.15          | 0.19          | 0.57           | 0.19          | -             | -             | -             | -              | -              | 0.14           | -             | -             | 0.21           | -              | -             | -             | 0.20          | 0.19          |
| <b>SubTOTAL</b>                | <b>2433.64</b> | <b>813.06</b> | <b>409.53</b> | <b>675.58</b> | <b>1370.22</b> | <b>852.74</b> | <b>780.04</b> | <b>655.41</b> | <b>706.17</b> | <b>3036.90</b> | <b>1161.99</b> | <b>2198.89</b> | <b>754.30</b> | <b>834.13</b> | <b>2394.07</b> | <b>2184.87</b> | <b>940.85</b> | <b>759.72</b> | <b>946.31</b> | <b>607.27</b> |
| %                              | <b>25.74%</b>  | <b>91.99%</b> | <b>11.95%</b> | <b>89.28%</b> | <b>31.04%</b>  | <b>9.67%</b>  | <b>94.45%</b> | <b>92.48%</b> | <b>86.52%</b> | <b>96.09%</b>  | <b>39.60%</b>  | <b>96.24%</b>  | <b>89.75%</b> | <b>87.01%</b> | <b>94.62%</b>  | <b>90.41%</b>  | <b>96.16%</b> | <b>13.19%</b> | <b>8.92%</b>  | <b>13.21%</b> |
| <b>Isoprenoid derivatives</b>  |                |               |               |               |                |               |               |               |               |                |                |                |               |               |                |                |               |               |               |               |
| $\alpha$ -Pinene               | -              | -             | -             | -             | -              | -             | -             | -             | 0.24          | -              | -              | -              | -             | 1.25          | -              | 0.13           | -             | -             | -             | -             |
| $\beta$ -Pinene                | 19.79          | -             | -             | -             | 3.68           | -             | -             | -             | -             | 0.21           | -              | 0.11           | 0.14          | 1.55          | -              | -              | 0.34          | -             | -             | 3.68          |
| Phellandrene                   | 6.96           | 0.15          | 0.39          | 0.06          | 0.77           | 1.87          | -             | -             | -             | 0.22           | 1.17           | 0.28           | 0.25          | 0.16          | 0.20           | 0.45           | -             | 0.56          | 1.89          | 0.58          |
| $\beta$ -Myrcene               | 3.14           | 0.79          | 3.05          | 2.07          | -              | 12.13         | 0.93          | 1.18          | 1.32          | -              | 5.08           | -              | -             | 2.70          | -              | 1.73           | 0.86          | 9.17          | 27.75         | 4.67          |
| D-Limonene                     | 42.63          | 2.43          | 3.38          | 34.55         | 16.12          | 14.98         | 7.32          | 21.96         | 25.70         | 1.23           | 4.95           | 6.03           | 4.20          | 100.27        | 0.62           | 21.95          | 21.35         | 32.61         | 40.92         | 7.79          |
| $\gamma$ -Terpinene            | 4.33           | 0.18          | 0.98          | 0.93          | 1.02           | 2.38          | 0.29          | 0.69          | 0.68          | 1.46           | 0.90           | -              | 0.44          | 2.77          | -              | 2.49           | 0.58          | 0.97          | 4.50          | 0.86          |
| p-Cymene                       | 1.82           | 0.17          | 0.40          | 0.29          | 0.77           | 0.90          | 0.18          | 0.24          | 0.21          | 0.44           | 0.84           | 0.31           | 0.27          | 0.79          | 0.21           | 0.60           | 0.30          | 0.47          | 0.96          | 0.35          |
| Terpinolene                    | 11.67          | 0.45          | 3.44          | 0.45          | 5.29           | 16.02         | 0.13          | 0.44          | 0.25          | 1.09           | 2.36           | 0.83           | 0.93          | 0.50          | 0.74           | 3.07           | 0.27          | 2.42          | 13.48         | 4.27          |
| Rose oxide II (cis)            | 1.30           | -             | -             | -             | -              | -             | -             | -             | -             | -              | -              | -              | -             | -             | -              | -              | -             | -             | -             | -             |
| Rose oxide I (trans)           | 1.81           | -             | 0.08          | -             | 0.21           | 0.26          | -             | 0.03          | -             | -              | -              | 0.14           | 0.09          | -             | -              | -              | -             | -             | 0.14          | 0.08          |
| Nerol oxide                    | 3.36           | -             | 1.15          | 0.11          | 1.29           | 7.30          | -             | 0.06          | -             | -              | -              | -              | -             | -             | -              | -              | -             | 0.21          | 1.86          | 2.98          |
| Linalool                       | 278.88         | 0.13          | 71.47         | 0.20          | 132.88         | 267.03        | 0.80          | 0.07          | 0.16          | 0.56           | 40.54          | 0.28           | 0.70          | 0.23          | 1.18           | 1.40           | 0.15          | 31.88         | 208.45        | 45.29         |
| 4-Terpineol                    | 4.40           | 0.40          | 0.56          | -             | 0.29           | 1.32          | -             | -             | -             | 1.84           | 0.34           | 1.15           | 1.78          | -             | 1.08           | 2.44           | -             | -             | 0.87          | 0.66          |

|                                |                |              |                |              |                |                |              |              |               |              |                |              |              |               |              |               |              |                |                |                |
|--------------------------------|----------------|--------------|----------------|--------------|----------------|----------------|--------------|--------------|---------------|--------------|----------------|--------------|--------------|---------------|--------------|---------------|--------------|----------------|----------------|----------------|
| Hotrienol                      | 1.01           | -            | 0.51           | -            | 1.94           | 9.17           | -            | -            | -             | -            | 0.11           | -            | -            | -             | -            | -             | -            | 0.16           | 0.68           | 0.61           |
| Neral                          | 47.11          | -            | 17.26          | -            | 9.55           | 45.11          | -            | -            | 0.61          | -            | 9.77           | -            | 2.01         | -             | -            | 3.78          | -            | 17.72          | 53.41          | 7.51           |
| $\alpha$ -Terpineol            | 98.07          | 0.22         | 22.58          | 0.42         | 35.70          | 122.36         | 0.26         | 0.54         | 0.42          | 1.42         | 19.75          | 0.56         | 1.77         | -             | 0.08         | 8.67          | 1.12         | 13.26          | 103.96         | 31.43          |
| Geranial                       | 40.42          | 0.48         | 30.76          | 1.08         | 18.28          | 62.81          | 0.45         | 0.30         | 1.48          | 1.52         | 14.15          | 1.09         | 4.49         | -             | 1.51         | 7.20          | -            | 37.45          | 108.95         | 16.22          |
| Citronellol                    | 398.87         | 3.17         | 6.27           | 0.65         | 19.45          | 50.57          | 1.14         | 1.36         | 0.17          | -            | 0.68           | 4.90         | 2.25         | -             | 5.06         | 3.10          | -            | 18.03          | 39.56          | 5.59           |
| Myrtenol                       | -              | -            | -              | 0.16         | -              | -              | -            | -            | -             | -            | -              | -            | -            | -             | 0.11         | -             | -            | 0.26           | -              | -              |
| Nerol                          | 813.02         | 1.80         | 77.06          | 2.17         | 83.06          | 611.74         | 0.79         | 1.21         | 0.40          | 6.31         | 64.84          | 7.37         | 4.54         | -             | 4.70         | 25.83         | -            | 181.17         | 569.48         | 302.87         |
| Geraniol                       | 1883.53        | 5.00         | 145.33         | -            | 203.33         | 905.46         | 6.39         | 6.49         | 4.17          | 10.20        | 313.27         | 14.85        | 10.03        | -             | 5.32         | 32.29         | -            | 651.52         | 2426.78        | 625.07         |
| E-Nerolidol                    | -              | -            | -              | -            | 0.42           | -              | -            | -            | -             | -            | 0.16           | -            | -            | -             | -            | -             | -            | 0.18           | -              | 0.39           |
| Cedrol                         | 5.10           | 1.12         | 1.81           | 1.38         | 4.37           | 3.84           | 1.50         | 1.30         | 1.47          | 1.99         | 1.88           | 2.68         | 1.33         | 3.80          | 2.45         | 1.77          | 2.42         | 1.86           | 2.75           | 2.23           |
| Geranic acid                   | 3334.14        | 27.57        | 2614.39        | 26.16        | 2418.64        | 5815.51        | 3.29         | 2.82         | 50.26         | 22.95        | 1279.92        | 1.72         | -            | -             | 13.31        | 75.14         | 4.79         | 3996.61        | 6040.71        | 2906.19        |
| $\beta$ -Damascenone           | 0.02           | 0.01         | 0.05           | 0.03         | 0.04           | 0.08           | 0.07         | 0.01         | 0.01          | 0.14         | 0.10           | 0.02         | 0.03         | 0.06          | 0.04         | 0.06          | 0.04         | 0.01           | 0.05           | 0.03           |
| Geranyl acetone                | -              | 0.07         | 0.24           | 0.12         | 0.48           | -              | 0.12         | 0.12         | 0.10          | 0.19         | -              | 0.12         | 0.12         | 0.28          | 0.17         | 0.14          | 0.19         | -              | -              | -              |
| $\beta$ -Ionone                | 0.46           | 0.20         | 0.18           | 0.38         | 0.57           | 0.40           | 0.24         | 0.26         | 0.26          | 0.36         | 0.38           | 0.41         | 0.32         | 0.46          | 0.44         | 0.32          | 0.54         | 0.33           | 0.46           | 0.27           |
| <b>SubTOTAL</b>                | <b>7001.86</b> | <b>44.43</b> | <b>3001.35</b> | <b>70.68</b> | <b>2958.17</b> | <b>7951.61</b> | <b>23.64</b> | <b>38.52</b> | <b>87.50</b>  | <b>52.62</b> | <b>1761.18</b> | <b>43.05</b> | <b>36.29</b> | <b>114.58</b> | <b>37.07</b> | <b>193.65</b> | <b>26.89</b> | <b>4996.61</b> | <b>9647.61</b> | <b>3969.59</b> |
| <b>%</b>                       | <b>74.04%</b>  | <b>5.03%</b> | <b>87.58%</b>  | <b>9.34%</b> | <b>67.02%</b>  | <b>90.15%</b>  | <b>2.86%</b> | <b>5.44%</b> | <b>10.72%</b> | <b>1.67%</b> | <b>60.02%</b>  | <b>1.88%</b> | <b>4.32%</b> | <b>11.95%</b> | <b>1.47%</b> | <b>8.01%</b>  | <b>2.75%</b> | <b>86.77%</b>  | <b>90.97%</b>  | <b>86.33%</b>  |
| <b>Amino acids derivatives</b> |                |              |                |              |                |                |              |              |               |              |                |              |              |               |              |               |              |                |                |                |
| 2-Ethyl hexanol                | 1.60           | 1.37         | 1.23           | 2.88         | 6.20           | 1.33           | 1.88         | 1.54         | 5.54          | 2.60         | 4.51           | 2.05         | 2.22         | 5.98          | 1.40         | 3.74          | 2.75         | 1.46           | 2.28           | 1.22           |
| Benzyl alcohol                 | -              | -            | -              | -            | 1.01           | 0.04           | 0.08         | 0.05         | -             | -            | 0.06           | -            | -            | -             | -            | -             | -            | -              | -              | 4.08           |
| Phenylethyl alcohol            | -              | 7.49         | -              | -            | -              | -              | -            | -            | -             | 28.52        | -              | 22.47        | -            | -             | -            | -             | -            | -              | -              | -              |
| Ethyl isobutyrate              | -              | -            | -              | -            | -              | -              | -            | -            | -             | 0.35         | -              | -            | -            | -             | 0.02         | 0.24          | -            | -              | -              | -              |
| Ethyl 3-methylbutanoate        | -              | -            | -              | -            | -              | -              | -            | -            | -             | -            | -              | -            | -            | -             | -            | 0.07          | -            | -              | -              | -              |
| Methyl salicylate              | 7.08           | 2.29         | 0.25           | 0.66         | 3.38           | 1.38           | 1.69         | 0.32         | 0.23          | 0.52         | -              | 2.11         | 7.54         | 0.87          | 45.00        | 1.50          | 1.39         | 0.43           | -              | 0.42           |
| 3-Methylbutanal                | 0.38           | 0.23         | 0.32           | 0.15         | 1.06           | 0.37           | -            | 0.06         | 0.02          | 1.04         | -              | 0.33         | 0.27         | -             | -            | -             | 0.48         | -              | -              | 0.05           |
| Benzaldehyde                   | 10.40          | 13.89        | 13.79          | 6.50         | 71.98          | 13.04          | 18.52        | 12.25        | 16.69         | 35.55        | 6.35           | 14.66        | 38.48        | 3.09          | 52.72        | 32.29         | 3.99         | -              | 8.48           | 15.16          |
| Phenylacetaldehyde             | 1.45           | 1.12         | 0.36           | 0.27         | 1.91           | 0.35           | -            | 0.56         | -             | 2.24         | -              | 1.35         | 1.31         | -             | -            | 0.20          | 2.04         | -              | 0.38           | 0.46           |
| <b>SubTOTAL</b>                | <b>20.91</b>   | <b>26.39</b> | <b>15.95</b>   | <b>10.46</b> | <b>85.54</b>   | <b>16.51</b>   | <b>22.17</b> | <b>14.78</b> | <b>22.48</b>  | <b>70.82</b> | <b>10.92</b>   | <b>42.97</b> | <b>49.82</b> | <b>9.94</b>   | <b>99.14</b> | <b>38.04</b>  | <b>10.65</b> | <b>1.89</b>    | <b>11.14</b>   | <b>21.39</b>   |
| <b>%</b>                       | <b>0.22%</b>   | <b>2.99%</b> | <b>0.47%</b>   | <b>1.38%</b> | <b>1.94%</b>   | <b>0.19%</b>   | <b>2.68%</b> | <b>2.09%</b> | <b>2.75%</b>  | <b>2.24%</b> | <b>0.37%</b>   | <b>1.88%</b> | <b>5.93%</b> | <b>1.04%</b>  | <b>3.92%</b> | <b>1.57%</b>  | <b>1.09%</b> | <b>0.03%</b>   | <b>0.11%</b>   | <b>0.47%</b>   |

**Table S4. Concentrations ( $\mu\text{g}/\text{kg}$ ) of volatile compounds from different synthesis pathwaysd determined in skin of table grapes.** Data are shown as the means (n=3). - indicated that the compound was not detected. Capital letters refer to the table grape cultivars listed in Figure 1.

| Compounds                                | Pulp juice            |                | Skin                   |                |
|------------------------------------------|-----------------------|----------------|------------------------|----------------|
|                                          | Calibration graphs    | r <sup>2</sup> | Calibration graphs     | r <sup>2</sup> |
| <b>(A) C<sub>6</sub> alcohols</b>        |                       |                |                        |                |
| Hexanal                                  | y = 4.5912x - 0.1010  | 0.9975         | y = 3.1725x - 0.0382   | 0.9970         |
| (Z)-3-Hexenal                            | y = 1.8035x - 0.0040  | 0.9992         | y = 2.5281x - 0.0111   | 0.9958         |
| (E)-2-Hexenal                            | y = 4.5531x - 0.0035  | 0.9994         | y = 4.6736x - 0.0050   | 0.9990         |
| Hexanol                                  | y = 9.2890x - 0.1199  | 0.9965         | y = 7.8984x - 0.0400   | 0.9974         |
| (Z)-3-Hexenol                            | y = 11.0240x - 0.0027 | 0.9853         | y = 17.0820x - 0.0051  | 0.9989         |
| (E)-2-Hexenol                            | y = 13.9480x - 0.0047 | 0.9994         | y = 13.7670x - 0.0034  | 0.9997         |
| <b>(B) Alcohols</b>                      |                       |                |                        |                |
| 1-Octen-3-ol                             | y = 1.3250x - 0.0069  | 0.9980         | y = 1.6180x - 0.0134   | 0.9986         |
| Heptanol                                 | y = 1.1881x - 0.0076  | 0.9970         | y = 1.3041x - 0.0091   | 0.9960         |
| Octanol                                  | y = 0.9754x - 0.0027  | 0.9928         | y = 1.0166x - 0.0015   | 0.9952         |
| Benzyl alcohol                           | y = 1.3950x - 0.0047  | 0.9994         | y = 0.9843x + 0.0052   | 0.9994         |
| Phenylethyl alcohol                      | y = 0.6585x - 0.0074  | 0.9912         | y = 0.7681x + 0.0097   | 0.9987         |
| <b>(C) Esters</b>                        |                       |                |                        |                |
| Ethyl acetate                            | y = 33.1230x - 0.1999 | 0.9981         | y = 35.3580x - 0.2197  | 0.9980         |
| Ethyl isobutyrate                        | y = 6.4466x - 0.0788  | 0.9910         | y = 7.2902x - 0.0932   | 0.9992         |
| Ethyl butyrate                           | y = 3.4627x - 0.0602  | 0.9818         | y = 2.4866x - 0.0293   | 0.9996         |
| Butyl acetate                            | y = 0.7849x - 0.0009  | 0.9998         | y = 0.6986x + 0.0022   | 0.9998         |
| Ethyl pentanoate                         | y = 12.8954x + 0.0218 | 0.9980         | y = 10.6769x - 0.0016  | 0.9954         |
| Ethyl hexanoate                          | y = 0.9127x + 0.0215  | 0.9983         | y = 0.9278x + 0.0284   | 0.9964         |
| Hexyl acetate                            | y = 0.9114x - 0.0003  | 0.9990         | y = 0.8568x - 0.0018   | 0.9954         |
| Methyl salicylate                        | y = 3.8718x - 0.0023  | 0.9862         | y = 3.1641x - 0.0009   | 0.9943         |
| <b>(D) Acids</b>                         |                       |                |                        |                |
| Hexanoic acid                            | y = 19.2880x - 0.0240 | 0.9990         | y = 25.0740x - 0.0336  | 0.9976         |
| 2-Hexenoic acid                          | y = 93.9740x - 0.0108 | 0.9912         | y = 79.4640x - 0.8541  | 0.9984         |
| Octanoic acid                            | y = 9.0389x - 0.0052  | 0.9714         | y = 14.6190x - 0.0064  | 0.9812         |
| <b>(E) Aldehydes</b>                     |                       |                |                        |                |
| 3-Methylbutanal                          | y = 17.4890x - 0.0137 | 0.9959         | y = 11.6450x - 0.0062  | 0.9995         |
| Octanal                                  | y = 1.4606x - 0.0019  | 0.9965         | y = 1.5628x - 0.0029   | 0.9997         |
| Pentanal                                 | y = 1.8075x - 0.0040  | 0.9967         | y = 2.5201x - 0.0111   | 0.9975         |
| Nonanal                                  | y = 3.9123x - 0.0087  | 0.9950         | y = 3.3018x - 0.0104   | 0.9952         |
| Benzaldehyde                             | y = 7.3396x - 0.0116  | 0.9988         | y = 5.6839x + 0.0011   | 0.9924         |
| <b>(F) Terpenes</b>                      |                       |                |                        |                |
| Phellandrene                             | y = 1.7816x + 0.0012  | 0.9977         | y = 1.6636x + 0.0014   | 0.9953         |
| β-Myrcene                                | y = 1.4759x + 0.0083  | 0.9989         | y = 1.1303x + 0.0216   | 0.9994         |
| D-Limonene                               | y = 1.6730x - 0.0056  | 0.9994         | y = 1.3342x - 0.0110   | 0.9990         |
| p-Cymene                                 | y = 0.8372x - 0.0021  | 0.9999         | y = 0.5940x + 0.0015   | 0.9988         |
| Terpinolene                              | y = 1.1842x + 0.0008  | 0.9990         | y = 0.9242x + 0.0059   | 0.9974         |
| Rose oxide II (cis)                      | y = 0.8258x - 0.0640  | 0.9984         | y = 0.7654x - 0.0011   | 0.9990         |
| Rose oxide I (trans)                     | y = 0.8469x - 0.0870  | 0.9978         | y = 0.7236x - 0.0347   | 0.9980         |
| Linalool                                 | y = 1.0045x - 0.0052  | 0.9995         | y = 0.9860x - 0.0042   | 0.9993         |
| 4-Terpineol                              | y = 1.7880x - 0.0003  | 0.9995         | y = 1.8654x - 0.0005   | 0.9993         |
| Neral                                    | y = 4.7844x - 0.0034  | 0.9996         | y = 7.7458x - 0.0035   | 0.9987         |
| α-Terpineol                              | y = 2.2722x + 0.0023  | 0.9978         | y = 2.9073x - 0.0149   | 0.9959         |
| Geranial                                 | y = 5.5101x + 0.0018  | 0.9976         | y = 9.0050x - 0.01020  | 0.9980         |
| Citronellol                              | y = 1.4392x + 0.0119  | 0.9975         | y = 2.0652x - 0.0249   | 0.9987         |
| Nerol                                    | y = 2.6263x - 0.0117  | 0.9927         | y = 1.8067x - 0.0045   | 0.9997         |
| Geraniol                                 | y = 4.4518x + 0.0223  | 0.9961         | y = 7.9694x - 0.0197   | 0.9957         |
| Geranic acid                             | y = 48.1500x + 0.0086 | 0.9962         | y = 124.5300x - 0.1318 | 0.9971         |
| <b>(G) C<sub>13</sub>-Norisoprenoids</b> |                       |                |                        |                |
| β-Damascenone                            | y = 0.8996x + 0.0003  | 0.9982         | y = 0.7654x + 0.0002   | 0.9994         |
| Geranyl acetone                          | y = 0.6941x - 0.0008  | 0.9923         | y = 0.5892x + 0.0006   | 0.9965         |
| β-Ionone                                 | y = 0.4747x + 0.0005  | 0.9983         | y = 0.5041x + 0.0021   | 0.9981         |

**Table S5. Quantitative standards and calibration graphs for quantification of volatile compounds in pulp juice and skin of table grape.** y, concentration ratio of a compound to the 2-octanol (internal standard); x, peak area ratio of a compound to the 2-octanol. r, regression coefficient.

| Compounds                         | Pulp juice               |                           |                                                    |                                  | Skin                     |                             |                                                    |                                  |
|-----------------------------------|--------------------------|---------------------------|----------------------------------------------------|----------------------------------|--------------------------|-----------------------------|----------------------------------------------------|----------------------------------|
|                                   | Concentration in (µg/kg) | Added (µg/L)              | Recovery (%)                                       | Reproducibility r.s.d. (%) (n=4) | Concentration in (µg/kg) | Added (µg/L)                | Recovery (%)                                       | Reproducibility r.s.d. (%) (n=4) |
| <b>(A) C<sub>6</sub> alcohols</b> |                          |                           |                                                    |                                  |                          |                             |                                                    |                                  |
| Hexanal                           | 33.06 ± 1.94             | 203.34<br>101.67<br>20.33 | 71.25 ± 0.39<br>83.74 ± 12.73<br>100.67 ± 0.13     | 0.39<br>8.73<br>0.13             | 97.61 ± 9.05             | 720.32<br>200.00<br>72.02   | 97.6 ± 1.14<br>80.11 ± 1.69<br>84.98 ± 4.25        | 2.78<br>1.55<br>4.66             |
| (Z)-3-Hexenal                     | 0.00                     | 3.15<br>1.57<br>0.32      | 82.79 ± 11.63<br>80.76 ± 8.72<br>69.64 ± 9.10      | 11.63<br>8.72<br>9.10            | 0.00                     | 2.02<br>1.01<br>0.20        | 86.23 ± 0.18<br>65.42 ± 0.11<br>76.21 ± 0.04       | 4.21<br>7.66<br>1.28             |
| (E)-2-Hexenal                     | 8.85 ± 1.44              | 648.70<br>324.34<br>64.87 | 84.80 ± 0.42<br>99.61 ± 4.99<br>93.85 ± 3.85       | 0.42<br>4.99<br>3.85             | 245.48 ± 52.62           | 806.75<br>403.38<br>80.68   | 82.93 ± 5.81<br>95.29 ± 9.22<br>112.52 ± 14.66     | 2.78<br>5.61<br>7.80             |
| Hexanol                           | 18.68 ± 1.88             | 340.84<br>170.42<br>34.08 | 120.80 ± 2.34<br>121.33 ± 10.14<br>147.78 ± 4.24   | 2.34<br>10.14<br>4.24            | 187.94 ± 15.39           | 331.62<br>165.81<br>33.16   | 74.97 ± 1.44<br>85.55 ± 2.94<br>97.67 ± 3.32       | 0.45<br>3.46<br>1.92             |
| (E)-3-Hexenol                     | 0.00                     | 10.73<br>5.36<br>1.07     | 87.21 ± 2.15<br>116.34 ± 7.76<br>294.33 ± 3.33     | 2.15<br>7.76<br>3.33             | 4.34 ± 0.61              | 48.12<br>24.07<br>4.81      | 67.02 ± 15.28<br>59.82 ± 21.11<br>21.95 ± 26.77    | 4.33<br>12.94<br>32.84           |
| (E)-2-Hexenol                     | 5.11 ± 0.38              | 450.28<br>225.14<br>45.03 | 104.32 ± 1.56<br>119.79 ± 6.35<br>113.22 ± 1.24    | 1.56<br>6.35<br>1.24             | 42.91 ± 4.67             | 580.23<br>290.16<br>58.02   | 71.89 ± 3.14<br>82.28 ± 6.10<br>96.02 ± 13.68      | 4.12<br>1.91<br>4.15             |
| <b>(B) Alcohols</b>               |                          |                           |                                                    |                                  |                          |                             |                                                    |                                  |
| 1-Octen-3-ol                      | 0.00                     | 1.57<br>0.79<br>0.16      | 98.37 ± 11.22<br>101.93 ± 6.79<br>99.81 ± 7.82     | 11.22<br>6.79<br>7.82            | 0.00                     | 7.87<br>3.94<br>0.78        | 92.25 ± 6.47<br>93.54 ± 5.89<br>92.47 ± 8.17       | 8.36<br>1.54<br>3.66             |
| Heptanol                          | 0.00                     | 1.07<br>0.53<br>0.11      | 72.31 ± 8.37<br>75.46 ± 12.05<br>77.94 ± 6.39      | 8.37<br>12.05<br>6.39            | 1.52 ± 0.22              | 5.17<br>2.59<br>0.52        | 76.68 ± 10.31<br>73.49 ± 9.64<br>87.42 ± 9.52      | 5.20<br>8.13<br>7.84             |
| Octanol                           | 0.78 ± 0.1               | 1.89<br>0.94<br>0.19      | 159.94 ± 21.82<br>205.04 ± 71.41<br>122.02 ± 43.76 | 11.82<br>11.41<br>3.76           | 0.09 ± 0.02              | 4.99<br>2.49<br>0.50        | 78.42 ± 5.16<br>75.91 ± 2.91<br>83.16 ± 6.14       | 3.85<br>7.56<br>6.57             |
| Benzyl alcohol                    | 0.00                     | 4.54<br>2.27<br>0.45      | 69.09 ± 8.71<br>72.60 ± 6.66<br>77.40 ± 6.81       | 8.71<br>6.66<br>6.81             | 0.00                     | 8.34<br>4.17<br>0.83        | 69.12 ± 1.56<br>71.64 ± 1.89<br>76.27 ± 1.04       | 1.67<br>2.88<br>0.96             |
| Phenylethyl alcohol               | 0.00                     | 8.76<br>4.38<br>0.88      | 83.31 ± 7.89<br>86.97 ± 8.53<br>104.29 ± 8.15      | 7.89<br>8.53<br>8.15             | 0.00                     | 66.38<br>33.19<br>6.34      | 112.23 ± 3.68<br>96.62 ± 5.31<br>88.48 ± 4.45      | 1.99<br>0.95<br>2.67             |
| <b>(C) Esters</b>                 |                          |                           |                                                    |                                  |                          |                             |                                                    |                                  |
| Ethyl acetate                     | 21.38 ± 5.29             | 1937.50<br>968.25<br>1.94 | 76.31 ± 1.02<br>83.86 ± 7.72<br>111.71 ± 6.96      | 1.02<br>7.72<br>6.96             | 216.72 ± 18.01           | 1484.17<br>742.09<br>148.42 | 83.83 ± 8.45<br>89.89 ± 3.12<br>86.00 ± 1.40       | 4.34<br>7.18<br>2.03             |
| Ethyl isobutyrate                 | 0.00                     | 1.84<br>0.92<br>0.18      | 83.13 ± 3.49<br>97.35 ± 4.78<br>105.40 ± 6.34      | 3.49<br>4.78<br>6.34             | 0.00                     | 1.16<br>0.51<br>0.12        | 76.15 ± 10.32<br>85.78 ± 5.49<br>93.79 ± 9.19      | 4.57<br>8.21<br>11.73            |
| Ethyl butyrate                    | 0.53 ± 0.09              | 49.50<br>24.75<br>4.95    | 87.24 ± 3.09<br>87.12 ± 10.71<br>111.00 ± 3.28     | 3.09<br>10.71<br>3.28            | 0.47 ± 0.03              | 47.51<br>23.76<br>4.75      | 106.82 ± 5.64<br>78.47 ± 3.21<br>97.69 ± 5.59      | 5.59<br>2.86<br>4.79             |
| Butyl acetate                     | 0.00                     | 1.87<br>0.93<br>0.19      | 82.71 ± 7.94<br>101.75 ± 22.33<br>122.12 ± 17.41   | 7.94<br>22.33<br>17.41           | 0.00                     | 2.34<br>1.17<br>0.23        | 119.21 ± 12.36<br>135.46 ± 14.58<br>108.76 ± 8.76  | 11.66<br>8.75<br>9.67            |
| Ethyl pentanoate                  | 0.00                     | 2.69<br>1.34<br>0.27      | 110.10 ± 14.39<br>82.73 ± 6.71<br>65.39 ± 9.17     | 14.39<br>6.71<br>9.17            | 0.00                     | 8.07<br>4.03<br>0.81        | 127.00 ± 35.49<br>124.26 ± 23.12<br>109.47 ± 14.21 | 22.94<br>9.45<br>12.84           |
| Ethyl hexanoate                   | 1.98 ± 0.54              | 27.30<br>13.65<br>2.73    | 115.50 ± 6.88<br>116.14 ± 3.41<br>102.81 ± 2.43    | 6.88<br>3.41<br>2.43             | 2.13 ± 0.38              | 27.30<br>13.65<br>2.73      | 127.65 ± 8.68<br>139.81 ± 15.22<br>127.87 ± 30.79  | 1.98<br>0.63<br>14.54            |
| Hexyl acetate                     | 1.08 ± 0.23              | 1.38<br>0.69<br>0.14      | 109.41 ± 13.85<br>137.38 ± 10.31<br>109.90 ± 26.54 | 13.85<br>10.31<br>6.54           | 1.78 ± 0.09              | 1.24<br>0.62<br>0.12        | 114.90 ± 7.54<br>114.19 ± 11.83<br>108.73 ± 11.18  | 3.10<br>1.14<br>10.22            |
| Methyl salicylate                 | 2.54 ± 0.17              | 7.20<br>3.60<br>0.72      | 70.63 ± 11.74<br>75.44 ± 7.89<br>74.37 ± 6.49      | 11.74<br>7.89<br>6.49            | 0.00                     | 54.73<br>27.37<br>5.47      | 76.17 ± 4.73<br>72.38 ± 2.19<br>88.74 ± 2.37       | 1.83<br>1.76<br>1.00             |
| <b>(D) Acids</b>                  |                          |                           |                                                    |                                  |                          |                             |                                                    |                                  |
| Hexanoic acid                     | 0.00                     | 4.96<br>2.48<br>0.50      | 18.77 ± 6.24<br>0.00<br>0.00                       | 6.24                             | 0.00                     | 7.60<br>3.81<br>0.76        | 38.14 ± 0.10<br>0.00<br>0.00                       | 16.79                            |
| 2-Hexenoic acid                   | 0.00                     | 64.55<br>32.27<br>0.65    | 33.41 ± 9.17<br>38.71 ± 12.87<br>0.00              | 9.17<br>12.87                    | 16.53 ± 3.12             | 20.89<br>10.45<br>2.09      | 17.47 ± 3.31<br>12.76 ± 4.62<br>23.40 ± 27.51      | 6.77<br>11.13<br>16.24           |
| Octanoic acid                     | 0.00                     | 2.51<br>2.25<br>0.25      | 0.00<br>0.00<br>0.00                               |                                  | 2.13 ± 0.30              | 2.21<br>1.11<br>0.22        | 28.86 ± 19.81<br>38.65 ± 14.75<br>56.43 ± 68.53    | 9.12<br>27.70<br>9.05            |
| <b>(E) Aldehydes</b>              |                          |                           |                                                    |                                  |                          |                             |                                                    |                                  |
| 3-Methylbutanal                   | 0.00                     | 5.57<br>2.78<br>0.56      | 79.61 ± 16.56<br>95.83 ± 10.22<br>64.39 ± 11.63    | 16.56<br>10.22<br>11.63          | 0.00                     | 2.96<br>1.48<br>0.30        | 75.62 ± 11.37<br>74.78 ± 8.79<br>77.42 ± 21.56     | 2.65<br>11.67<br>8.27            |
| Octanal                           | 0.32 ± 0.16              | 2.00<br>1.00<br>0.20      | 107.52 ± 6.12<br>132.12 ± 7.98<br>114.01 ± 30.46   | 6.12<br>7.98<br>3.46             | 0.21 ± 0.01              | 2.00<br>1.00<br>0.20        | 102.26 ± 7.54<br>119.54 ± 20.66<br>121.76 ± 25.11  | 1.26<br>8.48<br>4.56             |

| Compounds                            | Pulp juice               |              |                |                                  | Skin                     |              |                |                                  |
|--------------------------------------|--------------------------|--------------|----------------|----------------------------------|--------------------------|--------------|----------------|----------------------------------|
|                                      | Concentration in (µg/kg) | Added (µg/L) | Recovery (%)   | Reproducibility r.s.d. (%) (n=4) | Concentration in (µg/kg) | Added (µg/L) | Recovery (%)   | Reproducibility r.s.d. (%) (n=4) |
| Pentanal                             | 0.00                     | 5.14         | 96.47 ± 2.43   | 2.43                             | 0.00                     | 3.88         | 51.36 ± 22.70  | 0.07                             |
|                                      |                          | 2.57         | 108.46 ± 5.68  | 5.68                             |                          | 1.94         | 58.16 ± 11.26  | 5.08                             |
|                                      |                          | 0.51         | 87.62 ± 7.32   | 7.32                             |                          | 0.39         | 72.79 ± 53.68  | 10.85                            |
| Nonanal                              | 6.24 ± 0.58              | 13.79        | 111.08 ± 2.24  | 2.24                             | 4.35 ± 0.61              | 14.75        | 90.18 ± 1.64   | 0.07                             |
|                                      |                          | 6.89         | 121.02 ± 14.07 | 14.07                            |                          | 7.38         | 88.92 ± 3.90   | 5.08                             |
|                                      |                          | 1.38         | 86.85 ± 9.53   | 9.53                             |                          | 1.48         | 91.44 ± 7.78   | 10.85                            |
| Benzaldehyde                         | 2.36 ± 0.46              | 15.30        | 108.03 ± 2.58  | 2.58                             | 1.25 ± 0.08              | 75.62        | 88.71 ± 4.75   | 3.43                             |
|                                      |                          | 7.65         | 104.68 ± 3.42  | 3.42                             |                          | 37.81        | 89.81 ± 7.50   | 4.56                             |
|                                      |                          | 1.53         | 103.18 ± 5.18  | 5.18                             |                          | 7.56         | 98.30 ± 17.44  | 13.20                            |
| <b>(F) Terpenes</b>                  |                          |              |                |                                  |                          |              |                |                                  |
| Phellandrene                         | 0.11 ± 0.01              | 2.12         | 88.34 ± 10.4   | 10.40                            | 0.08 ± 0.01              | 10.69        | 118.55 ± 12.71 | 2.19                             |
|                                      |                          | 1.06         | 93.01 ± 3.40   | 3.40                             |                          | 5.35         | 130.03 ± 22.55 | 5.12                             |
|                                      |                          | 0.21         | 88.57 ± 4.83   | 4.83                             |                          | 1.07         | 167.29 ± 35.92 | 10.46                            |
| β-Myrcene                            | 0.98 ± 0.36              | 12.50        | 170.10 ± 22.96 | 22.96                            | 2.59 ± 0.22              | 25.00        | 140.14 ± 11.22 | 3.56                             |
|                                      |                          | 6.25         | 147.43 ± 5.82  | 5.82                             |                          | 12.50        | 136.29 ± 15.41 | 4.49                             |
|                                      |                          | 1.25         | 121.54 ± 10.98 | 10.98                            |                          | 2.50         | 118.59 ± 20.68 | 8.07                             |
| D-Limonene                           | 4.24 ± 0.40              | 45.16        | 108.72 ± 12.91 | 0.91                             | 4.37 ± 0.31              | 106.90       | 123.64 ± 14.55 | 1.73                             |
|                                      |                          | 22.58        | 101.57 ± 11.44 | 11.44                            |                          | 53.45        | 116.90 ± 22.88 | 4.18                             |
|                                      |                          | 4.52         | 106.95 ± 2.49  | 2.49                             |                          | 10.69        | 132.91 ± 31.09 | 6.41                             |
| P-Cymene                             | 0.00                     | 2.15         | 175.21 ± 18.96 | 18.96                            | 0.33 ± 0.01              | 3.15         | 115.83 ± 9.13  | 1.74                             |
|                                      |                          | 1.08         | 185.43 ± 23.37 | 3.37                             |                          | 1.58         | 119.81 ± 14.73 | 6.60                             |
|                                      |                          | 0.22         | 168.91 ± 17.17 | 7.17                             |                          | 0.32         | 121.14 ± 20.49 | 18.06                            |
| Terpinolene                          | 0.54 ± 0.01              | 8.40         | 103.58 ± 3.42  | 3.42                             | 5.74 ± 0.43              | 18.40        | 68.56 ± 10.35  | 6.54                             |
|                                      |                          | 4.20         | 104.66 ± 1.87  | 1.87                             |                          | 9.20         | 78.57 ± 5.47   | 7.50                             |
|                                      |                          | 0.84         | 98.79 ± 7.21   | 7.21                             |                          | 1.84         | 89.54 ± 16.47  | 1.54                             |
| Rose oxide                           | 0.00                     | 6.00         | 72.05 ± 2.64   | 2.64                             | 0.00                     | 5.74         | 77.46 ± 21.33  | 6.25                             |
|                                      |                          | 3.00         | 122.75 ± 0.33  | 0.33                             |                          | 2.87         | 134.04 ± 66.77 | 11.25                            |
|                                      |                          | 0.60         | 100.72 ± 0.39  | 0.39                             |                          | 0.57         | 102.22 ± 19.93 | 22.28                            |
| Linalool                             | 49.78 ± 2.24             | 78.88        | 128.81 ± 1.21  | 1.21                             | 109.09 ± 5.26            | 358.42       | 113.30 ± 5.19  | 3.01                             |
|                                      |                          | 39.44        | 125.81 ± 1.54  | 1.54                             |                          | 179.21       | 110.13 ± 7.75  | 7.63                             |
|                                      |                          | 7.89         | 110.42 ± 1.40  | 1.40                             |                          | 35.84        | 104.75 ± 7.34  | 6.92                             |
| 4-Terpineol                          | 1.04 ± 0.09              | 3.86         | 101.90 ± 0.84  | 0.84                             | 0.48 ± 0.03              | 3.46         | 100.26 ± 5.35  | 2.95                             |
|                                      |                          | 1.93         | 117.34 ± 1.67  | 1.67                             |                          | 1.73         | 100.36 ± 7.89  | 3.01                             |
|                                      |                          | 0.39         | 211.44 ± 1.13  | 1.13                             |                          | 0.35         | 104.72 ± 14.00 | 1.72                             |
| Neral                                | 0.00                     | 62.91        | 78.89 ± 9.06   | 9.06                             | 0.00                     | 4.62         | 129.47 ± 7.34  | 8.23                             |
|                                      |                          | 31.45        | 84.18 ± 7.13   | 7.13                             |                          | 2.31         | 131.03 ± 10.36 | 3.44                             |
|                                      |                          | 6.29         | 69.48 ± 5.34   | 5.34                             |                          | 0.46         | 70.14 ± 2.89   | 5.07                             |
| α-Terpineol                          | 3.59 ± 0.61              | 56.20        | 78.06 ± 1.28   | 1.28                             | 41.88 ± 3.66             | 219.61       | 115.48 ± 6.23  | 3.88                             |
|                                      |                          | 28.10        | 82.34 ± 3.12   | 3.12                             |                          | 109.81       | 112.35 ± 9.50  | 8.96                             |
|                                      |                          | 5.62         | 88.51 ± 2.01   | 2.01                             |                          | 21.96        | 104.67 ± 10.34 | 10.23                            |
| Geranial                             | 0.11 ± 0.05              | 10.85        | 85.56 ± 1.49   | 1.49                             | 0.94 ± 0.08              | 201.99       | 102.93 ± 7.89  | 5.05                             |
|                                      |                          | 5.42         | 94.12 ± 0.31   | 0.31                             |                          | 100.99       | 107.73 ± 11.61 | 2.46                             |
|                                      |                          | 1.09         | 112.45 ± 2.07  | 2.07                             |                          | 20.20        | 115.48 ± 23.36 | 9.18                             |
| Citronellol                          | 1.10 ± 0.09              | 16.98        | 69.84 ± 0.84   | 0.84                             | 1.13 ± 0.09              | 482.36       | 115.76 ± 3.37  | 3.27                             |
|                                      |                          | 8.49         | 110.19 ± 1.54  | 1.54                             |                          | 241.18       | 113.59 ± 30.38 | 11.27                            |
|                                      |                          | 1.70         | 88.36 ± 3.86   | 3.86                             |                          | 48.24        | 79.76 ± 64.96  | 3.66                             |
| Nerol                                | 0.00                     | 89.47        | 93.31 ± 1.00   | 1.00                             | 0.00                     | 25.86        | 97.69 ± 5.39   | 3.88                             |
|                                      |                          | 44.73        | 101.78 ± 3.99  | 3.99                             |                          | 12.93        | 99.79 ± 5.65   | 10.45                            |
|                                      |                          | 8.95         | 103.61 ± 3.51  | 3.51                             |                          | 2.59         | 94.28 ± 4.78   | 6.72                             |
| Geraniol                             | 4.59 ± 0.33              | 54.31        | 117.91 ± 2.51  | 2.51                             | 0.01 ± 0.00              | 116.40       | 98.27 ± 4.71   | 1.36                             |
|                                      |                          | 27.26        | 116.06 ± 2.32  | 2.32                             |                          | 58.20        | 94.92 ± 8.92   | 2.10                             |
|                                      |                          | 5.43         | 62.01 ± 35.51  | 33.51                            |                          | 11.64        | 98.23 ± 7.93   | 6.18                             |
| Geranic acid                         | 0.79 ± 0.09              | 116.44       | 70.00 ± 12.90  | 12.90                            | 8.14 ± 3.99              | 2301.89      | 95.89 ± 1.28   | 1.89                             |
|                                      |                          | 58.22        | 75.63 ± 7.16   | 7.16                             |                          | 1150.95      | 85.33 ± 3.14   | 10.27                            |
|                                      |                          | 11.64        | 80.23 ± 5.68   | 2.16                             |                          | 230.19       | 83.19 ± 2.90   | 18.82                            |
| <b>C<sub>13</sub>-Norisoprenoids</b> |                          |              |                |                                  |                          |              |                |                                  |
| β-Damascenone                        | 0.00                     | 0.23         | 85.44 ± 5.66   | 5.66                             | 0.00                     | 1.01         | 88.16 ± 3.64   | 4.40                             |
|                                      |                          | 0.11         | 88.32 ± 6.89   | 6.89                             |                          | 0.50         | 88.47 ± 1.89   | 2.80                             |
|                                      |                          | 0.02         | 84.23 ± 5.50   | 5.50                             |                          | 0.10         | 89.12 ± 2.76   | 2.95                             |
| Geranyl acetone                      | 0.07 ± 0.01              | 2.00         | 66.70 ± 6.91   | 6.91                             | 0.04 ± 0.01              | 1.90         | 105.25 ± 11.00 | 2.46                             |
|                                      |                          | 1.00         | 74.45 ± 4.01   | 4.01                             |                          | 0.95         | 103.83 ± 17.64 | 3.83                             |
|                                      |                          | 0.10         | 120.53 ± 21.66 | 21.66                            |                          | 0.19         | 104.31 ± 19.13 | 5.23                             |
| β-Ionone                             | 0.04 ± 0.01              | 1.96         | 93.51 ± 1.00   | 1.00                             | 0.01 ± 0.01              | 2.11         | 78.29 ± 5.27   | 7.59                             |
|                                      |                          | 0.98         | 86.49 ± 0.63   | 0.63                             |                          | 1.05         | 83.32 ± 9.50   | 6.74                             |
|                                      |                          | 0.20         | 84.80 ± 0.52   | 0.52                             |                          | 0.21         | 112.30 ± 26.00 | 3.73                             |

**Table S6. Recovery (%) and reproducibility (relative standard deviation, r.s.d.) (%) of the target skin and pulp juice volatile compounds in table grape.**
